# Supplementary material for: Family and Couple Integrated Cognitive-Behavioural Therapy for Adults with OCD: A Meta-Analysis
Source: Atypon-hosted journal article supplement (doi:10.1176/appi.focus.19404), 2021-10-01
Supplement: appi.focus.19404.ds001.pdf [file appi.focus.19404.ds001.pdf]

## Appendix A

### Study Characteristics

| Author                  | Study Design                | Patient Sample Size ( <i>n</i> ) and Patient Demographics (Diagnosis, Mean Age, % Female)                                                | OCD Treatment<br><i>Therapy Format</i>                                                                                                                   | OCD Treatment Techniques             | Comparison Group | Ratio of Patient Sessions to Family Sessions | Description of Family Treatment                                                                                                                                                                                                                                                | Outcome Classification                                                           |
|-------------------------|-----------------------------|------------------------------------------------------------------------------------------------------------------------------------------|----------------------------------------------------------------------------------------------------------------------------------------------------------|--------------------------------------|------------------|----------------------------------------------|--------------------------------------------------------------------------------------------------------------------------------------------------------------------------------------------------------------------------------------------------------------------------------|----------------------------------------------------------------------------------|
| Abramowitz et al., 2013 | Within-Subjects             | <i>n</i> = 16<br><br>DSM-IV-TR OCD diagnosis and self-reported OCD symptoms (≥moderate)<br><br><i>M</i> = 33.1<br><br>93.8% <sup>a</sup> | 16 sessions (90-120 minutes), first 8 bi-weekly, final 8 weekly<br><br>Follow-up assessments at 6- and 12-months post-treatment<br><br><i>Individual</i> | PE + ERP + TAC + RS+EAT              | N/A              | 16:16                                        | Family members attended all sessions and completed partner-assisted ERP without accommodation for homework. Skills were provided to enhance communication, reduce antagonism, and improve relationship satisfaction.                                                           | YBOCS, OCD Symptom Severity, Depression, Relationship Improvement, Accommodation |
| Aslam et al., 2015      | Within-Subjects             | <i>n</i> = 21<br><br>DSM-IV-TR OCD<br><br><i>M</i> = 31.1<br><br>42.9%                                                                   | Six sessions (45-60 minutes), weekly<br><br><i>Individual</i>                                                                                            | PE+ BE + ERP + PS + AS + CT+TAC+ EAT | N/A              | 6:7                                          | A family member accompanied the patient at each session and assisted with therapy as needed, including ERP. In addition, prior to starting therapy, the family attended a session. Family members were taught to reduce accommodation.                                         | YBOCS, OCD Symptom Severity, Depression, Anxiety, Functional Impairment          |
| Baruah et al., 2018     | Pre-Post Controlled (mixed) | <i>n</i> = 64<br><br>DSM-IV OCD and self-reported OCD symptoms (≥moderate)<br><br><i>M</i> = 30.5<br><br>45.3%                           | Six sessions (1.5-2 hours), over 3-4 weeks<br><br>Follow-up assessments at 1- and 3-months post-treatment<br><br><i>Individual</i>                       | PE +ERP + TAC + RS+EAT               | SRI+ PE + RT     | 6:6                                          | Family members attended all sessions. Psychoeducation about OCD, ERP, the family's role in therapy, and accommodation were provided. Families helped with ERP. Strategies for reducing accommodating behaviour and antagonism were also provided. Family burden was addressed. | YBOCS, OCS Symptom Severity, Antagonism, Accommodation                           |

| Author                  | Study Design                                                        | Patient Sample Size ( <i>n</i> ) and Patient Demographics (Diagnosis, Mean Age, % Female)                                                               | OCD Treatment Format<br><i>Therapy Format</i>                                                                                                   | OCD Treatment Techniques    | Comparison Group                              | Ratio of Patient Sessions to Family Sessions | Description of Family Treatment                                                                                                                                                   | Outcome Classification                                                                |
|-------------------------|---------------------------------------------------------------------|---------------------------------------------------------------------------------------------------------------------------------------------------------|-------------------------------------------------------------------------------------------------------------------------------------------------|-----------------------------|-----------------------------------------------|----------------------------------------------|-----------------------------------------------------------------------------------------------------------------------------------------------------------------------------------|---------------------------------------------------------------------------------------|
| Belus et al., 2014      | Within-Subjects                                                     | See Abramowitz et al., 2013                                                                                                                             | See Abramowitz et al., 2013                                                                                                                     | See Abramowitz et al., 2013 | N/A                                           | 16:16                                        | See Abramowitz et al., 2013                                                                                                                                                       | Partner Mental Health, Relationship Improvement, Antagonism                           |
| Emmelkamp & Lange, 1983 | Within-Subjects *<br>(data not available to compare between groups) | <i>n</i> = 12<br><br>Obsessive-compulsive behaviours present<br><br><i>M</i> = 33.5<br><br>83.33%                                                       | 10 sessions, (45 minutes), 2x/week<br><br>Follow-up assessments at 1- and 6-months post-treatment<br><br><i>Individual</i>                      | ERP+TAC+ EAT                | N/A                                           | 10:10                                        | Family members were provided a treatment rationale and assisted with the patient's exposures without providing reassurance/accommodation.                                         | OCD Symptom Severity, Depression, Anxiety                                             |
| Gomes et al., 2014      | Pre-Post Controlled (mixed)                                         | <i>n</i> = 98<br><br>DSM-IV OCD and self-reported OCD symptoms (≥moderate)<br><br>CBGT:<br><i>M</i> = 44.5<br>Controls:<br><i>M</i> = 37.1<br><br>62.2% | 12 sessions (2 hours), over 3 months<br><br><i>Group</i>                                                                                        | PE + ERP + CT + RP+TAC      | Waitlist control                              | 12:2                                         | Family members attended two sessions with patients (first and eighth sessions). Family members were provided psychoeducation about OCD, CBT, and accommodation.                   | YBOCS, OCD Symptom Severity, Depression, Anxiety, Accommodation, Family Mental Health |
| Grunes, 2016            | Pre-Post Controlled (mixed)                                         | <i>n</i> = 28<br><br>DSM-IV OCD<br><br><i>M</i> = 28.36<br><br>28.6%                                                                                    | Eight sessions (45 minutes), weekly for majority of participants<br><br>Follow-up assessment at 1-month post-treatment<br><br><i>Individual</i> | ERP+TAC+ RS                 | Individual therapy without family involvement | 8:8                                          | Family members participated in a support group separate from the patient's individual treatment. Psychoeducation and skills to reduce accommodation and antagonism were provided. | YBOCS, OCD Symptom Severity, Depression, Anxiety, Antagonism, Family Mental Health    |

| Author                 | Study Design                            | Patient Sample Size ( <i>n</i> ) and Patient Demographics (Diagnosis, Mean Age, % Female)                                              | OCD Treatment Format<br><i>Therapy Format</i>                                                                                                                                | OCD Treatment Techniques | Comparison Group   | Ratio of Patient Sessions to Family Sessions | Description of Family Treatment                                                                                                                                                                                                                                                                                                                                   | Outcome Classification                                                        |
|------------------------|-----------------------------------------|----------------------------------------------------------------------------------------------------------------------------------------|------------------------------------------------------------------------------------------------------------------------------------------------------------------------------|--------------------------|--------------------|----------------------------------------------|-------------------------------------------------------------------------------------------------------------------------------------------------------------------------------------------------------------------------------------------------------------------------------------------------------------------------------------------------------------------|-------------------------------------------------------------------------------|
| Haland et al., 2010    | Within-Subjects                         | <i>n</i> = 54<br><br>DSM-IV OCD and self-reported OCD symptoms (≥moderate)<br><br><i>M</i> = 35.9 <sup>a</sup><br><br>74% <sup>a</sup> | 12 sessions (2.5 hours), weekly<br><br>Follow-up assessment at 3- and 12-months post-treatment<br><br><i>Group</i>                                                           | PE + ERP                 | N/A                | 12:1                                         | Family members joined the group at week four. Psychoeducation about OCD and OCD treatment was provided as well as recommendations to assist family members with treatment.                                                                                                                                                                                        | YBOCS, OCD Symptom Severity, Depression, Anxiety                              |
| Himle et al., 2001     | Within-Subjects (2 independent samples) | <i>n</i> = 113<br><br>DSM-IV OCD<br><br><i>M</i> = 37.0<br><br>61.9%                                                                   | Either seven weekly sessions (2 hours) or 12-weekly sessions (seven 2-hour + five 1-hour sessions)<br><br>Follow-up assessment at 3-month post-treatment<br><br><i>Group</i> | PE + ERP                 | N/A                | 7 or 12: 1                                   | Family members attended a separate 2-hour session. Psychoeducation about OCD was provided, and family issues associated with OCD and strategies to improve them were discussed.                                                                                                                                                                                   | YBOCS, OCD Symptom Severity, Depression                                       |
| Kobayashi et al., 2020 | Pre-Post Controlled (mixed)             | <i>n</i> = 17<br><br>DSM-IV OCD and self-reported OCD symptoms (≥mild)<br><br><i>M</i> = 30.1<br><br>47.1%                             | 12-20 sessions (1 hour), weekly<br><br><i>Individual</i>                                                                                                                     | PE + ERP + TAC + RS+EAT  | Treatment as usual | 15 <sup>b</sup> : 8                          | Family members participated in eight 20-min joint sessions with the patient. They were provided psychoeducation on OCD and ERP and encouraged to motivate the patient to complete homework. Communication was enhanced through role-plays. Family members were encouraged to decrease family accommodation and antagonism. Family also took part in goal-setting. | YBOCS, OCD Symptom Severity, Depression, Functional Impairment, Accommodation |

| Author                        | Study Design                | Patient Sample Size ( <i>n</i> ) and Patient Demographics (Diagnosis, Mean Age, % Female)       | OCD Treatment Format<br><i>Therapy Format</i>                                                                    | OCD Treatment Techniques     | Comparison Group | Ratio of Patient Sessions to Family Sessions | Description of Family Treatment                                                                                                                                                                    | Outcome Classification                                                                                  |
|-------------------------------|-----------------------------|-------------------------------------------------------------------------------------------------|------------------------------------------------------------------------------------------------------------------|------------------------------|------------------|----------------------------------------------|----------------------------------------------------------------------------------------------------------------------------------------------------------------------------------------------------|---------------------------------------------------------------------------------------------------------|
| Mehta et al., 1990            | Pre-Post Controlled (mixed) | <i>n</i> = 30<br>DSM-III OCD<br><br>Ages 17-56<br><br>36.7%                                     | 24 sessions, 2/week for 12 weeks.<br><br>Follow-up assessment at 1-month post-treatment<br><br><i>Individual</i> | ERP + RT+ EAT                | ERP + RT         | 24:24                                        | Family members participated in ERP and relaxation therapy and were jointly responsible for ensuring homework completion. Family members were instructed not to participate in rituals with patient | OCD Symptom Severity, Anxiety, Depression, Functional Impairment                                        |
| Remmerswaal et al., 2016      | Within-Subjects             | <i>n</i> = 16<br><br>Self-reported OCD symptoms (≥moderate)<br><br><i>M</i> = 39.4<br><br>62.5% | Five sessions (1.5 hours), biweekly<br><br><i>Individual</i>                                                     | ERP + TAC + RS               | N/A              | 5:5                                          | Family members were taught to decrease accommodation and antagonistic responses by improving communication and scheduling joint activities.                                                        | YBOCS, OCD Symptom Severity, Functional Impairment, Antagonism, Relationship Improvement, Accommodation |
| Remmerswaal et al., 2019      | Within-Subjects             | See Remmerswaal et al., 2016                                                                    | See Remmerswaal et al., 2016                                                                                     | See Remmerswaal et al., 2016 | N/A              | 5:5                                          | See Remmerswaal et al., 2016                                                                                                                                                                       | Family Mental Health                                                                                    |
| Thompson-Holland et al., 2015 | Pre-Post Controlled (mixed) | <i>n</i> = 18<br>DSM-IV OCD<br><br><i>M</i> = 35.4<br><br>66.7%                                 | Weekly sessions (no constraints on amount of sessions)<br><br><i>Individual</i>                                  | ERP+TAC                      | ERP              | 18 <sup>b</sup> : 2                          | Family members attended 2 separate sessions that included psychoeducation about OCD, ERP, and accommodation. Family members engaged in problem solving and role-plays to decrease accommodation.   | YBOCS, OCD Symptom Severity, Accommodation                                                              |

| Author                  | Study Design                | Patient Sample Size ( <i>n</i> ) and Patient Demographics (Diagnosis, Mean Age, % Female)              | OCD Treatment Format<br><i>Therapy Format</i>                                                                                           | OCD Treatment Techniques                     | Comparison Group | Ratio of Patient Sessions to Family Sessions | Description of Family Treatment                                                                                                                                                                                                                                                                                                          | Outcome Classification                                                       |
|-------------------------|-----------------------------|--------------------------------------------------------------------------------------------------------|-----------------------------------------------------------------------------------------------------------------------------------------|----------------------------------------------|------------------|----------------------------------------------|------------------------------------------------------------------------------------------------------------------------------------------------------------------------------------------------------------------------------------------------------------------------------------------------------------------------------------------|------------------------------------------------------------------------------|
| Van Noppen et al., 1997 | Pre-Post Controlled (mixed) | <i>n</i> = 36<br>DSM-IV OCD<br>Engaged in rituals for at least the past year<br><i>M</i> = 33.0<br>67% | 10 or 12 sessions (2 hours), weekly, with 6 booster sessions<br><br>Follow-up assessment at 12-month post-treatment<br><br><i>Group</i> | Multifamily:<br>PE + ERP + TAC + EAT+TAC+ RS | PE + ERP         | 18:18 <sup>b</sup>                           | Family were provided psychoeducation about OCD and discussed their involvement in the patient's OCD. Behavioral contracting was used to decrease family involvement in rituals. Family assisted with planning exposures and practiced adaptive ways to respond to the patient's rituals (e.g., decreasing accommodation and antagonism). | YBOCS, OCD Symptom Severity, Functional Impairment, Relationship Improvement |

*Note.* a, demographics based on a treatment completers; b, average number of sessions completed. PE: psychoeducation, ERP: exposure with response prevention, CT: cognitive therapy, TAC: targeting accommodation, EAT: exposure assistance training, PS: problem solving, RS: strategies to improve relationship satisfaction and/or communication; BE: breathing exercises, RT: relaxation therapy, AS: activity scheduling, RP: relapse prevention. "Individual" means that treatment was not in a group format (e.g., each dyad was treated alone).

## Appendix B

### References for Studies in Meta-Analyses

- Abramowitz, J. S., Baucom, D. H., Boeding, S., Wheaton, M. G., Pukay-Martin, N. D., Fabricant, L. E., Paprocki, C., & Fischer, M. S. (2013). Treating obsessive-compulsive disorder in intimate relationships: A pilot study of couple-based cognitive-behavior therapy. *Behavior Therapy, 44*(3), 395-407. <https://doi.org/10.1016/j.beth.2013.02.005>
- Aslam, M., Ifran, M., & Naeem, F. (2015). Brief culturally adapted cognitive behaviour therapy for obsessive compulsive disorder: A pilot study. *Pakistan Journal of Medical Science, 31*(4), 874-879. <https://doi.org/10.12669/pjms.314.7385>
- Baruah, U., Pandian, R. D., Narayanaswamy, J. C., Math, S. B., Kandavel, T., & Reddy, J. (2018). A randomized controlled study of brief family-based intervention in obsessive compulsive disorder. *Journal of Affective Disorders, 225*, 137-146.
- Belus, J. M., Baucom, D. H., & Abramowitz, J. S. (2014). The effect of a couple-based treatment for OCD on intimate partners. *Journal of Behavior Therapy and Experimental Psychiatry, 45*, 484-488. <https://doi.org/10.1016/j.jbtep.2014.07.001>
- Emmelkamp, P. M. G., & De Lance, I. (1983). Spouse involvement in the treatment of obsessive-compulsive patients. *Behaviour Research and Therapy, 21*(4), 241-346. [https://doi.org/10.1016/0005-7967\(83\)90002-5](https://doi.org/10.1016/0005-7967(83)90002-5)
- Gomes, J. B., Cordiolo, A. V., Bortoncello, C. F., Braga, D. T., Goncalves, F., & Heldt, E. (2016). Impact of cognitive-behavioral group therapy for obsessive-compulsive disorder on family accommodation: A randomized clinical trial. *Psychiatry Research, 246*, 70-76. <https://doi.org/10.1016/j.psychres.2016.09.019>

- Grunes, M S., Neziroglu, F., & McKay, D. (2001). Family involvement in the behavioral treatment of obsessive-compulsive disorder: A preliminary investigation. *Behavior Therapy, 32*, 803-820. [https://doi.org/10.1016/S0005-7894\(01\)80022-8](https://doi.org/10.1016/S0005-7894(01)80022-8)
- Haland, A. T., Vogel, P. A., Lie, B., Launes, G., Pripp, A. H., & Himle, J. A. (2010). Behavioural group therapy for obsessive-compulsive disorder in Norway: An open community-based trial. *Behaviour Research and Therapy, 48*(6),547-554. <https://doi.org/10.1016/j.brat.2010.03.005>
- Himle, J. A., Rassi, S., Haghightagou, H., Krone, K. P., Nesse, R., & Abelson, J. (2001). Group behavioural therapy of obsessive-compulsive disorder: Seven vs. twelve-week outcomes. *Depression and Anxiety, 13*(4), 161-165.
- Kobayashi, Y., Kanie, A., Nakagawa, A., Takebayashi, Y., Shinmei, I., Nakayama, N., Yamaguchi, K., Nakayama, C., Hirabayashi, N., Mimura, M., & Horikoshi, M. (2020). An e valuation of family-based treatment for OCD in Japan: A pilot randomized controlled trial. *Frontiers in Psychiatry, 10*, 932-942. <https://doi.org/10.3389/fpsy.2019.00932>
- Mehta, M. (1990). A comparative study of family-based and patient-based behavioural management in obsessive-compulsive disorder. *British Journal of Psychiatry, 157*(1), 133-135. <https://doi.org/10.1192/bjp.157.1.133>
- Remmerswaal, K. C., Batelaan, N. M., Smit, J. H., van Oppen, P., & van Balkom, A. J. (2016). Feasibility and outcome of a brief cognitive behaviour therapy family intervention for patients with Obsessive-Compulsive Disorder: A pilot study. *Psychotherapy and Psychosomatics, 85*(3), 185-186. <https://doi.org/10.1159/000443511>

Remmerswaal, K. C., Batelaan, N. M., & van Balkom, A. J. (2019). Relieving the burden of family members of patients with obsessive-compulsive disorder. *Clinical Neuropsychiatry*, *16*(1), 47-52.

Thompson-Hollands, J., Abramovitch, A., Tompson, M. C., & Barlow, D. H. (2015). A randomized clinical trial of a brief family intervention to reduce accommodation in obsessive-compulsive disorder: A preliminary study. *Behavior Therapy*, *46*(2), 218-229. <https://doi.org/10.1016/j.beth.2014.11.001>

Van Noppen, B., Steketee, G., McCorkle, B. H., & Pato, M. (1997). Group and multifamily behavioral treatment for obsessive compulsive disorder: A pilot study. *Journal of Anxiety Disorders*, *11*(4), 431–446. [https://doi.org/10.1016/S0887-6185\(97\)00021-2](https://doi.org/10.1016/S0887-6185(97)00021-2)



## Appendix C

### Categorization of Outcome Measures

#### **OCD Symptoms**

##### *Interview/clinician-rated*

Yale-Brown Obsessive Compulsive Scale  
Clinical Global Impression Scales  
Anxiety-Discomfort Scale (averaged assessor and therapist)

##### *Self-report*

Dimensional Obsessive-Compulsive Scale  
Maudsley Obsessional-Compulsive Inventory  
Obsessive-Compulsive Inventory-Revised  
Patient Global Impression-Severity  
Anxiety-Discomfort Scale=patient report

#### **Reduction in Patient Functional Impairment**

Brief Disability Questionnaire  
Sheehan Disability Scale  
EuroQol  
World Health Organization Disability Assessment Schedule (WHODAS)  
Global Assessment of Severity (average across occupation, household responsibilities, family interaction, and leisure-time)

#### **Reduction in Patient Anxiety**

Hospital Anxiety and Depression scale (anxiety subscale)  
State-Trait Anxiety Inventory (state and trait)  
Beck Anxiety Inventory  
Neuroticism Questionnaire N-2 Scale  
Anxious and Depressed Mood Scale (anxiety subscale; averaged assessor and therapist)

#### **Reduction in Patient Depression Symptoms**

##### *Interview*

Anxious Depression (averaged assessor and therapist)  
Hamilton Rating Scale for Depression

##### *Self-Report*

Beck Depression Inventory  
Hospital Anxiety and Depression scale (depression subscale)  
Self-Rating Depression Scale  
Zung Self-Rating Depression Scale

#### **Family Member Mental Health/Burden (completed by family member)**

Beck Depression Inventory  
Beck Anxiety Inventory  
Involvement Evaluation Questionnaire  
Impact on Relatives Scale  
EuroQol  
Yale-Brown Obsessive Compulsive Scale

**Improved Relationship**

Dyadic Adjustment Scale  
Communication Patterns Questionnaire (Mutual Constructive Communication subscale)  
Atmosphere at home  
Communications Patterns Questionnaire (Avoidance/withholding and demand/withdraw subscales)  
Family Assessment Device  
Getting along

**Reduction in Antagonism**

The Family Emotional Involvement and Criticism Scale (perceived criticism)  
Family Attitude Scale  
Perceived Criticism Measure  
Criticism questions (Belus Paper)

**Decreased Accommodation/Overinvolvement**

Family Accommodation Scale  
Family Emotional Involvement and Criticism Scale (Emotional overinvolvement subscale)

---

# Appendix D

## Forest and Funnel Plots

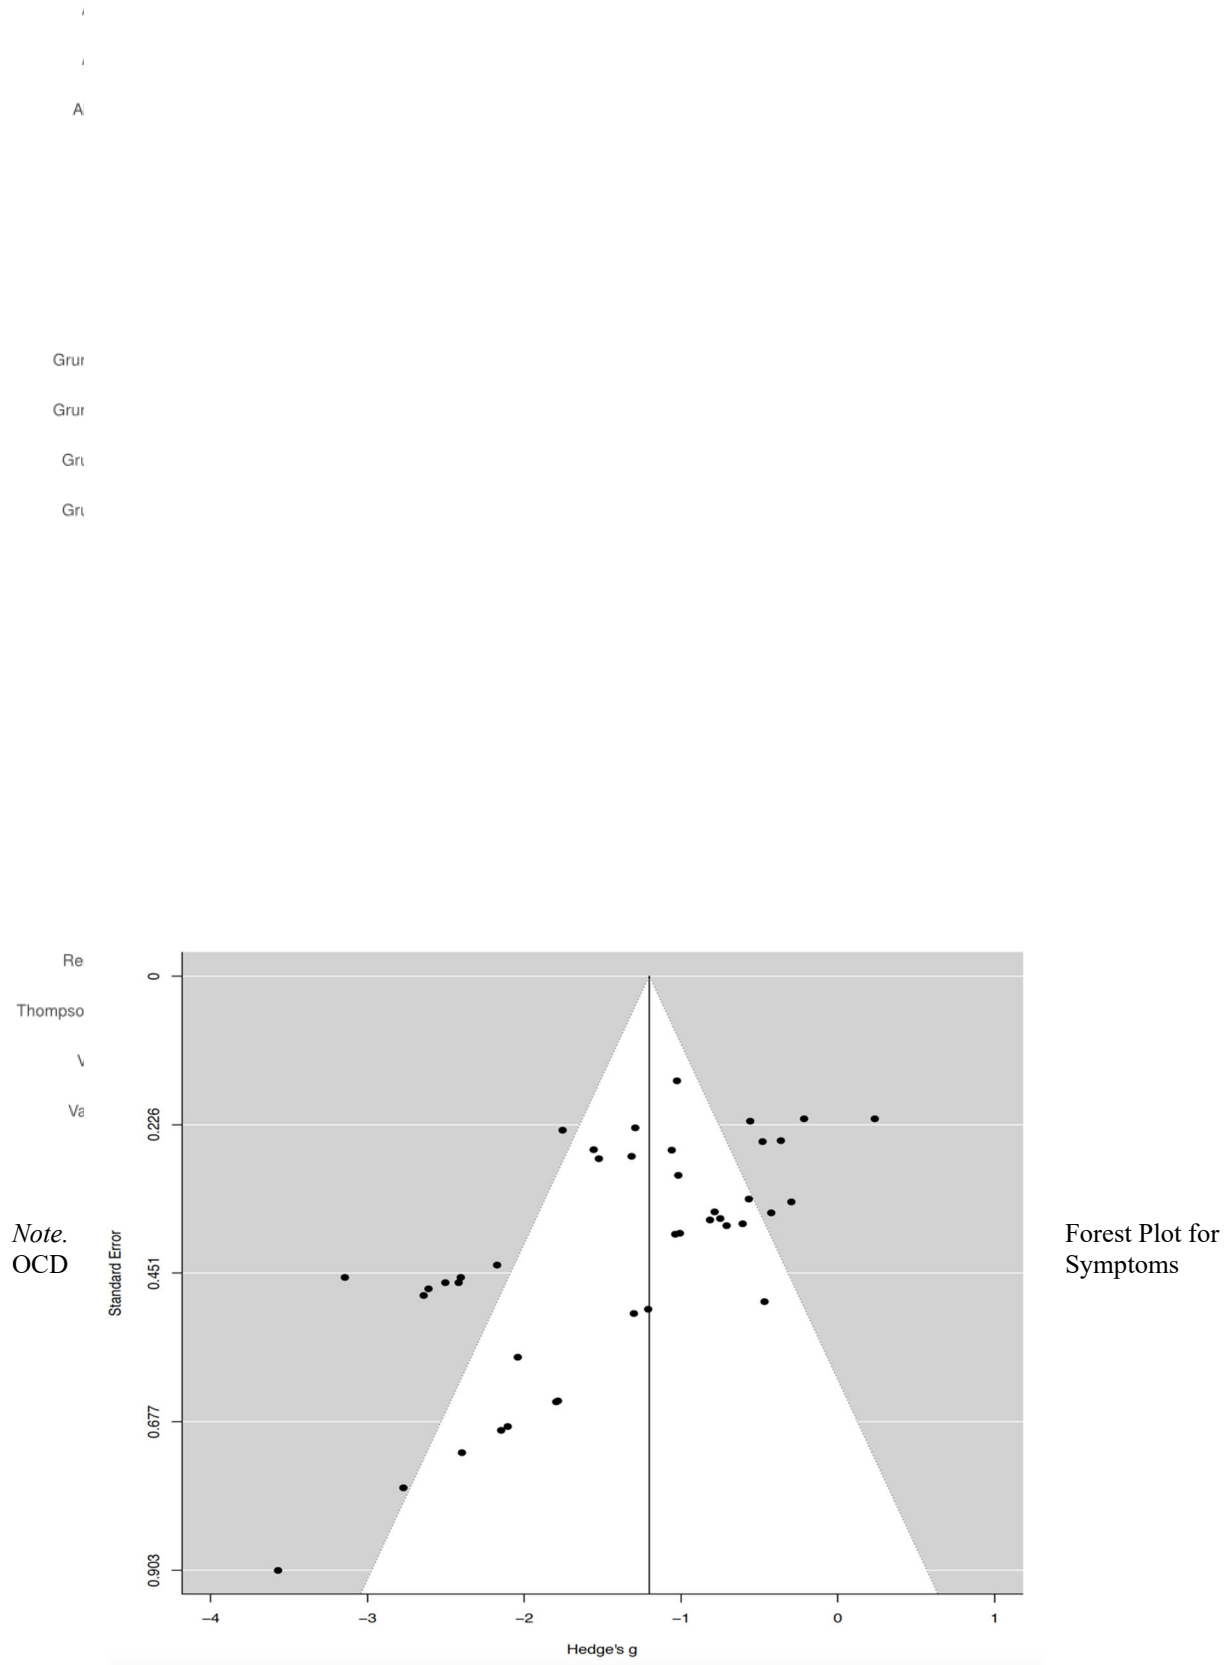

*Note.* Funnel Plot for OCD Symptoms

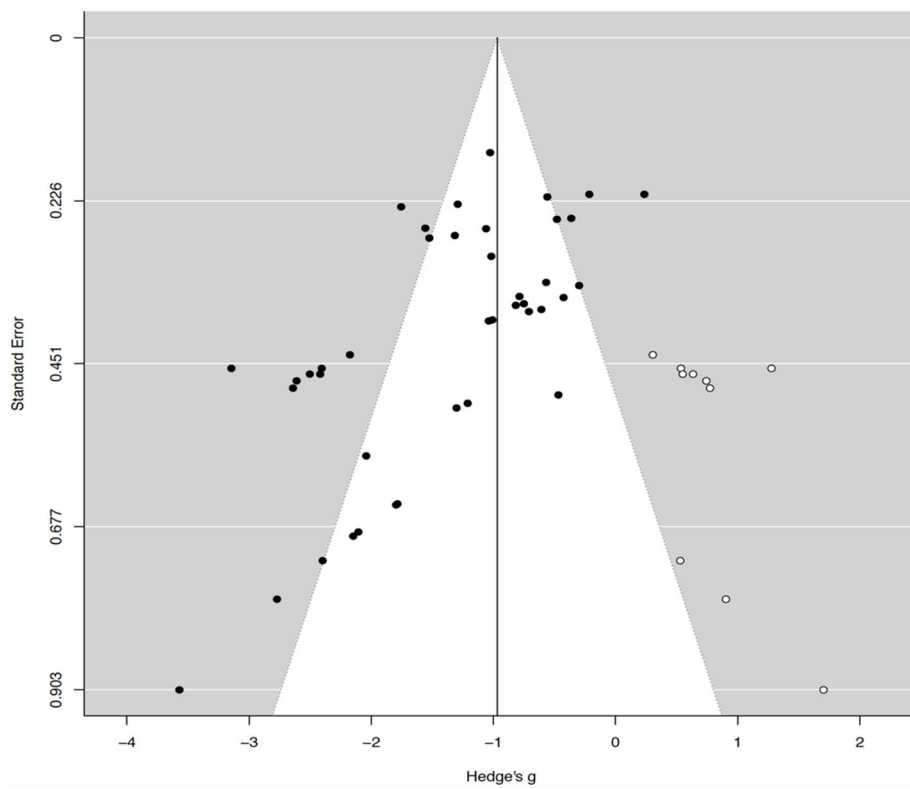

*Note.* Trim-Filled Funnel Plot for OCD Symptoms

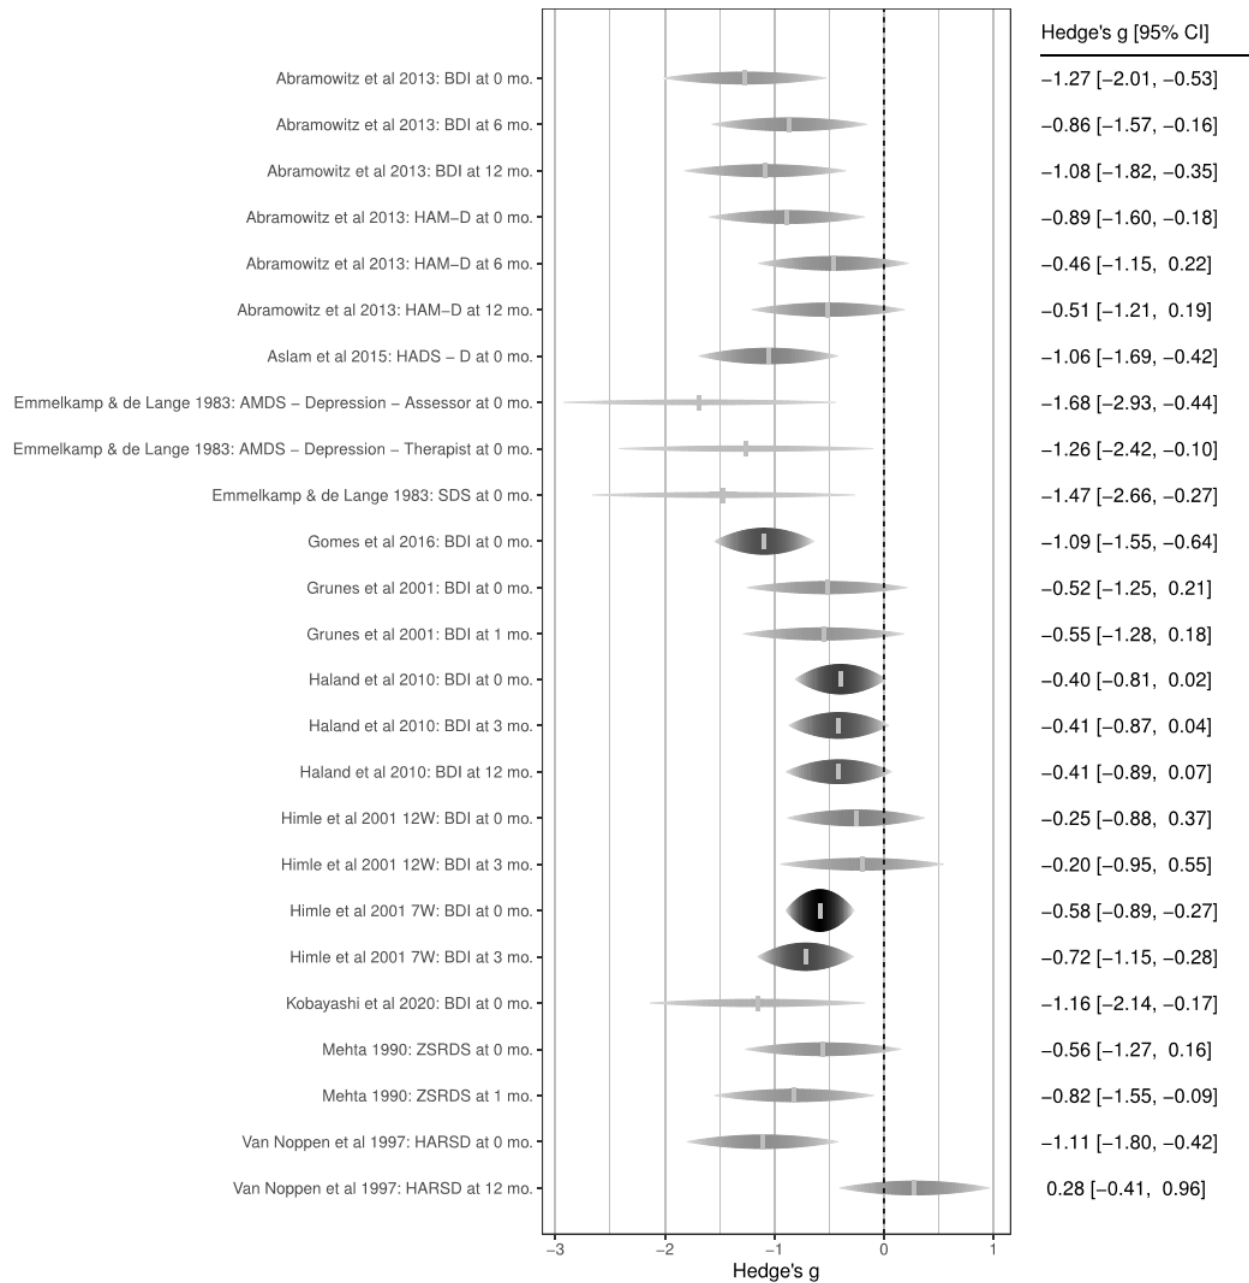

*Note.* Forest Plot for Depression Symptoms

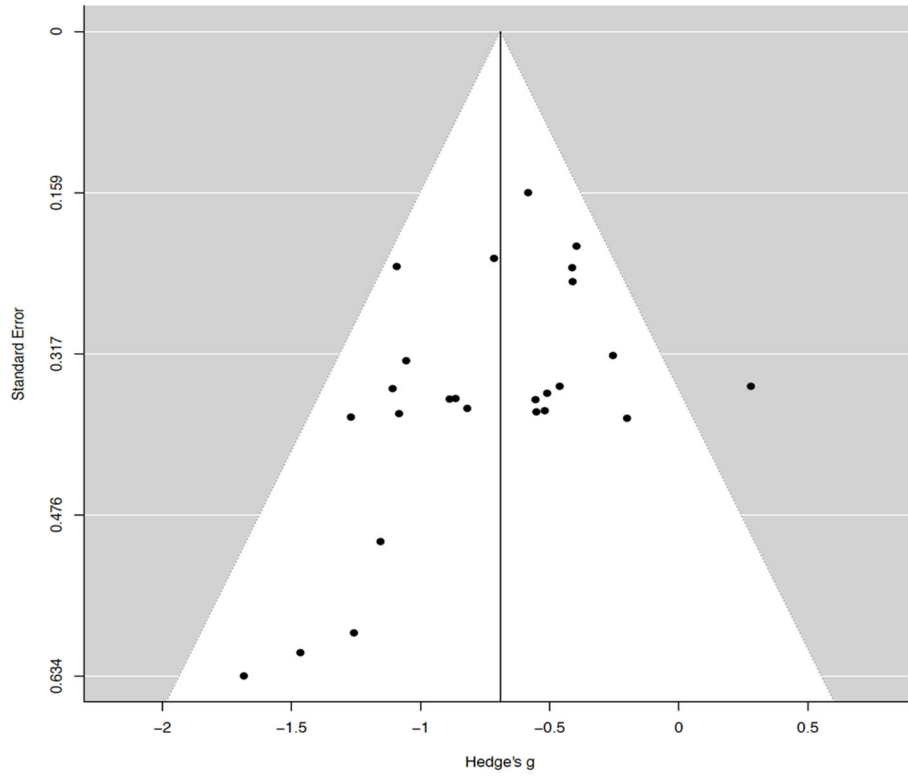

*Note.* Funnel Plot for Depression Symptoms

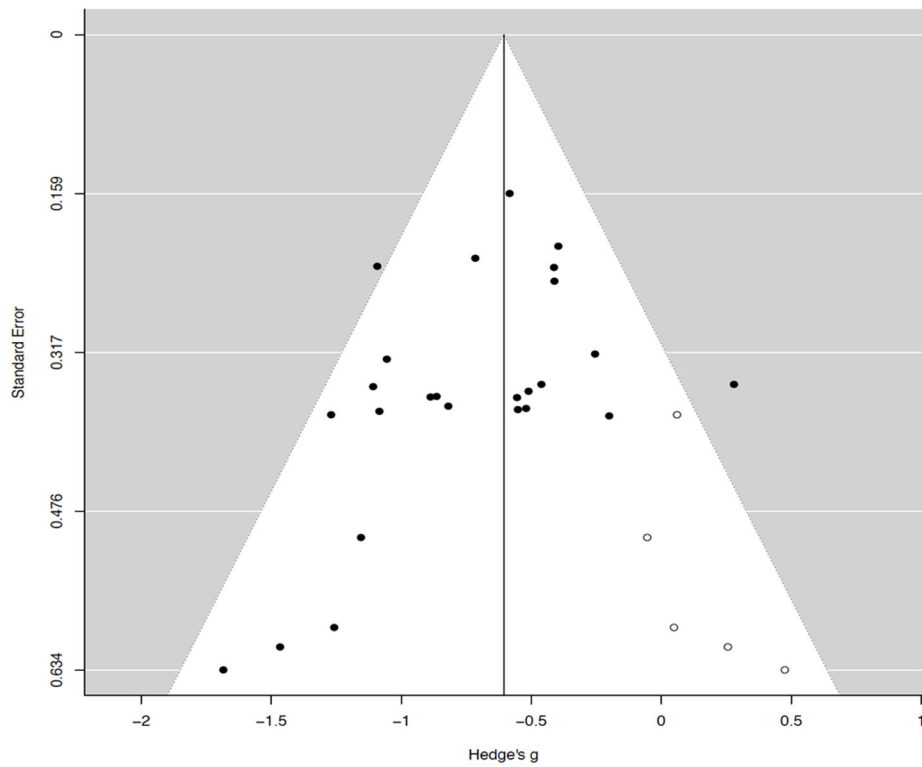

*Note.* Trim-Filled Funnel Plot for Depression Symptoms

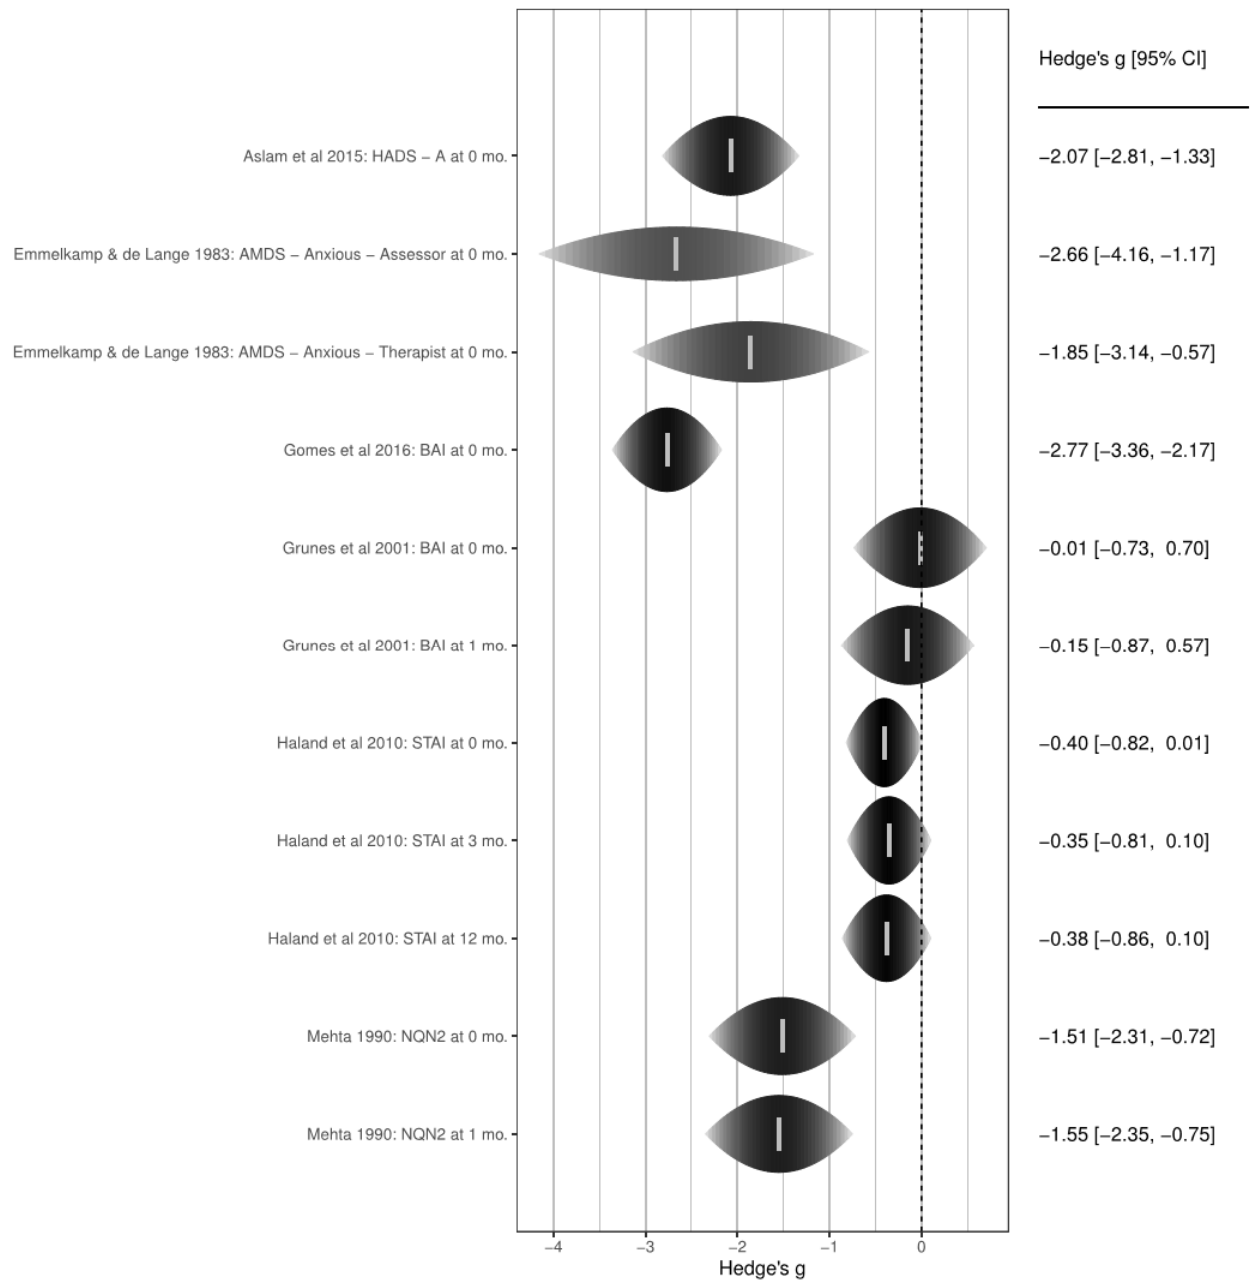

*Note.* Forest Plot for Anxiety Symptoms

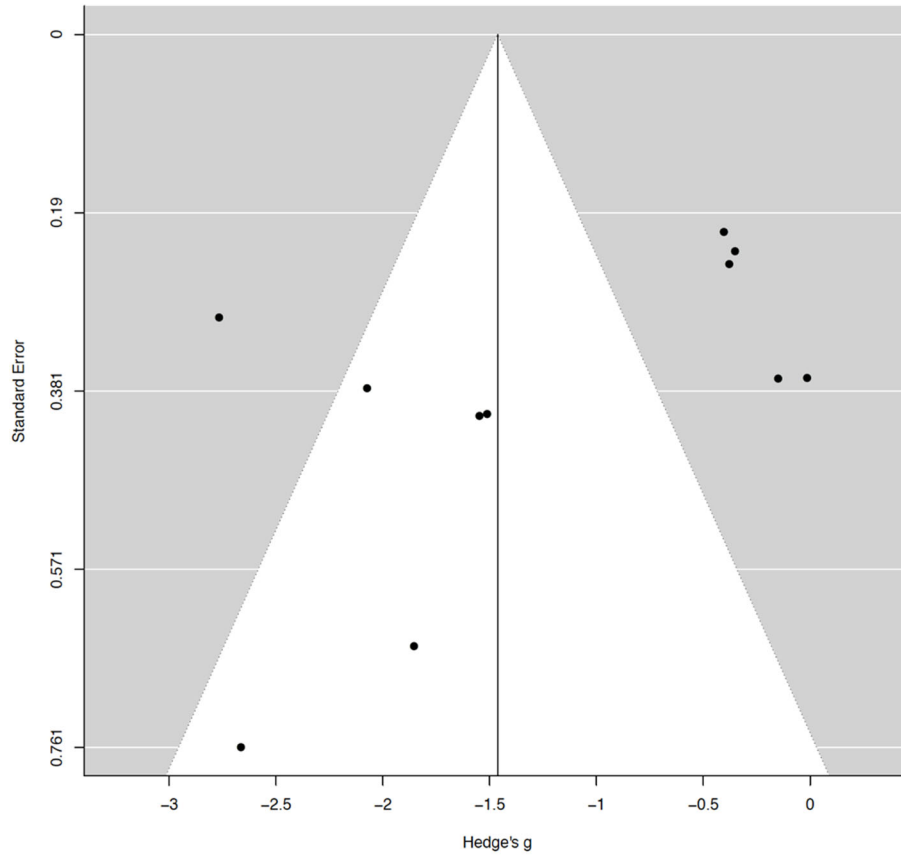

*Note.* Funnel Plot for Anxiety Symptoms



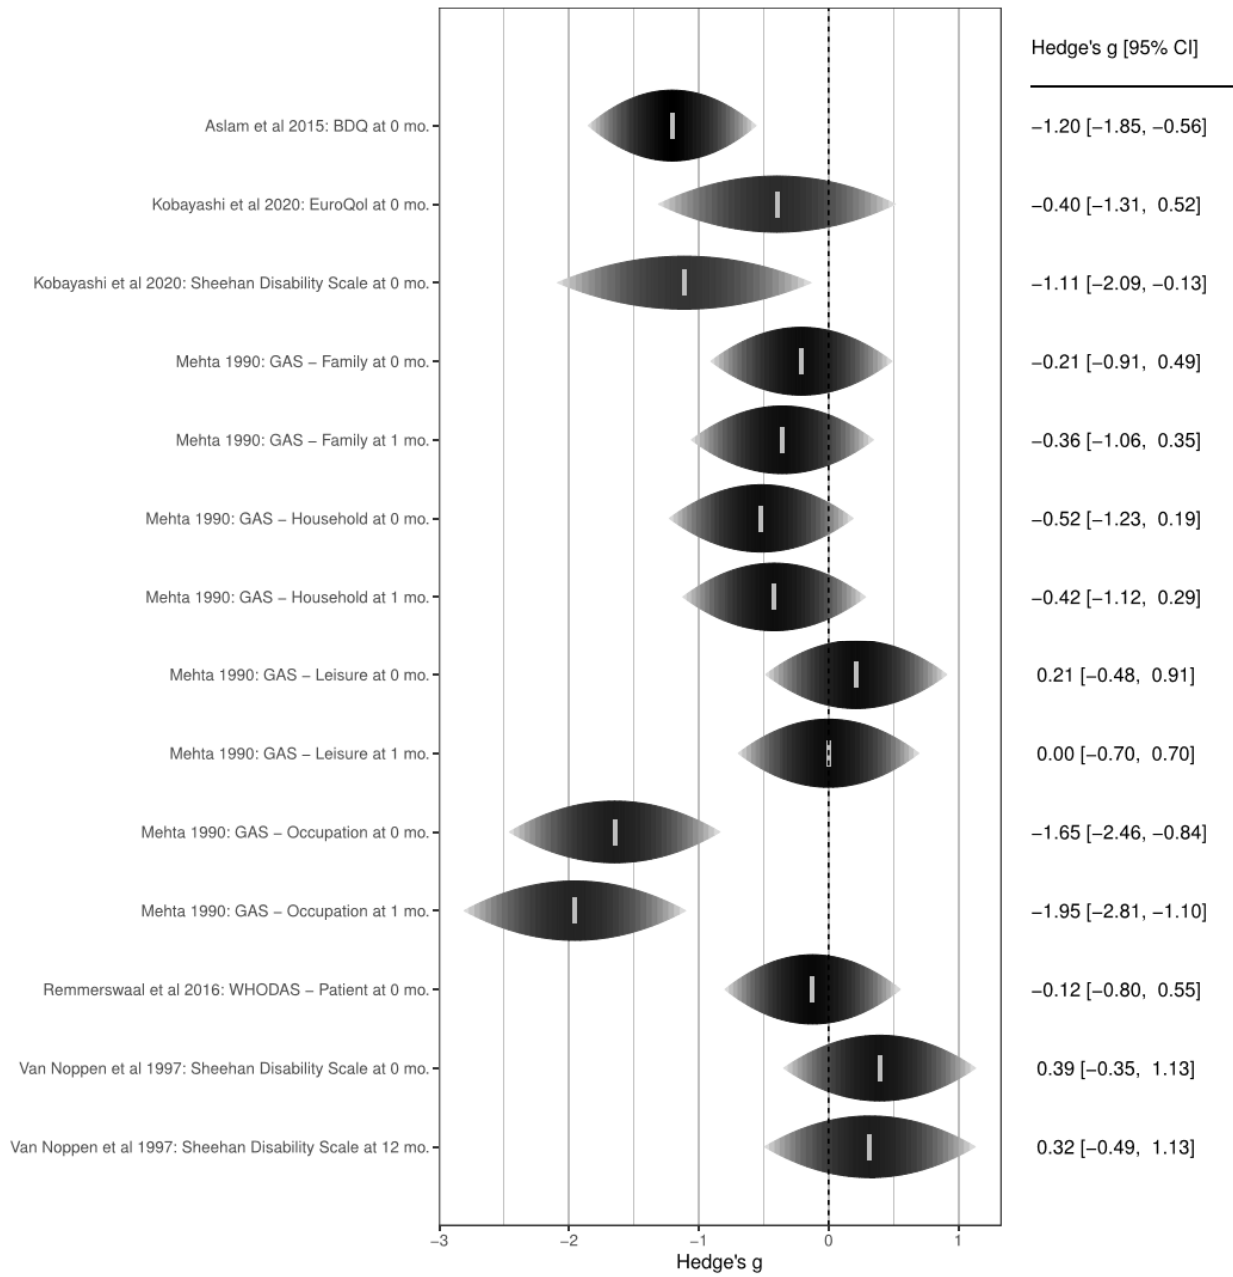

*Note.* Forest Plot for Functional Impairment

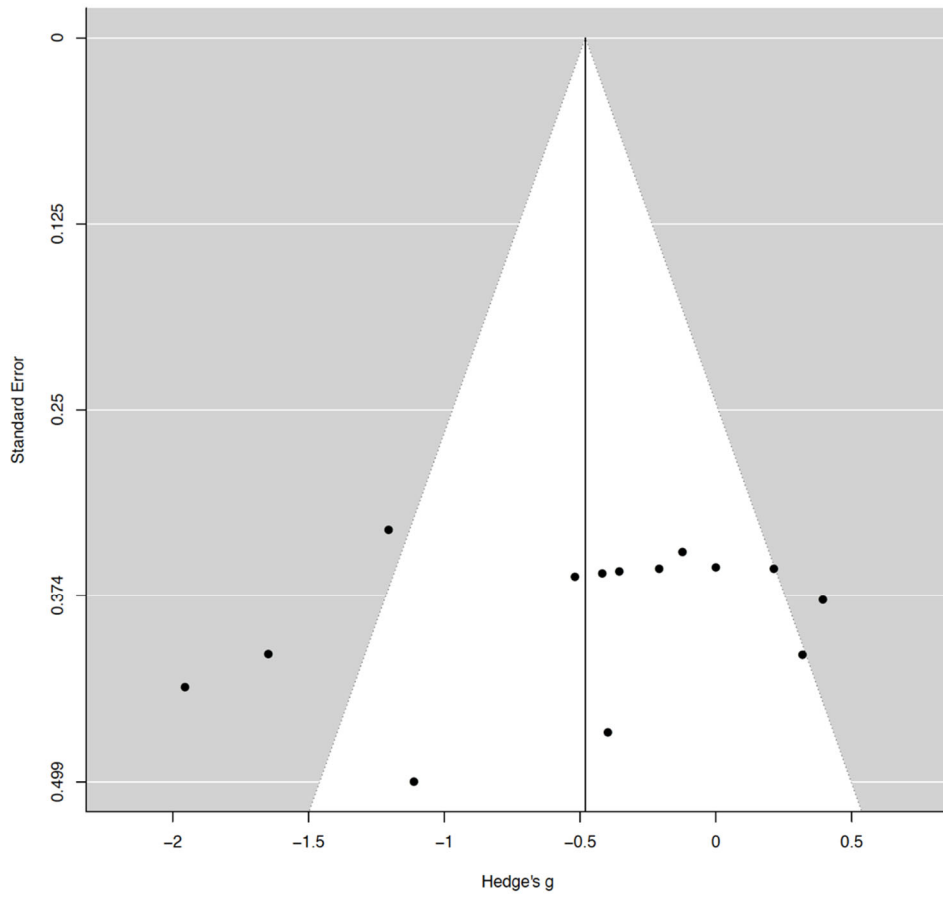

*Note.* Funnel Plot for Functional Impairment

/  
Abramo  
Abramo  
Abramow

/

|  
|  
B  
Belus et  
Belus et  
Belus et a  
|  
|  
B

Remmers  
Remmerswa  
Van Noppen et  
Van Noppen et a

*Note.*  
Relational

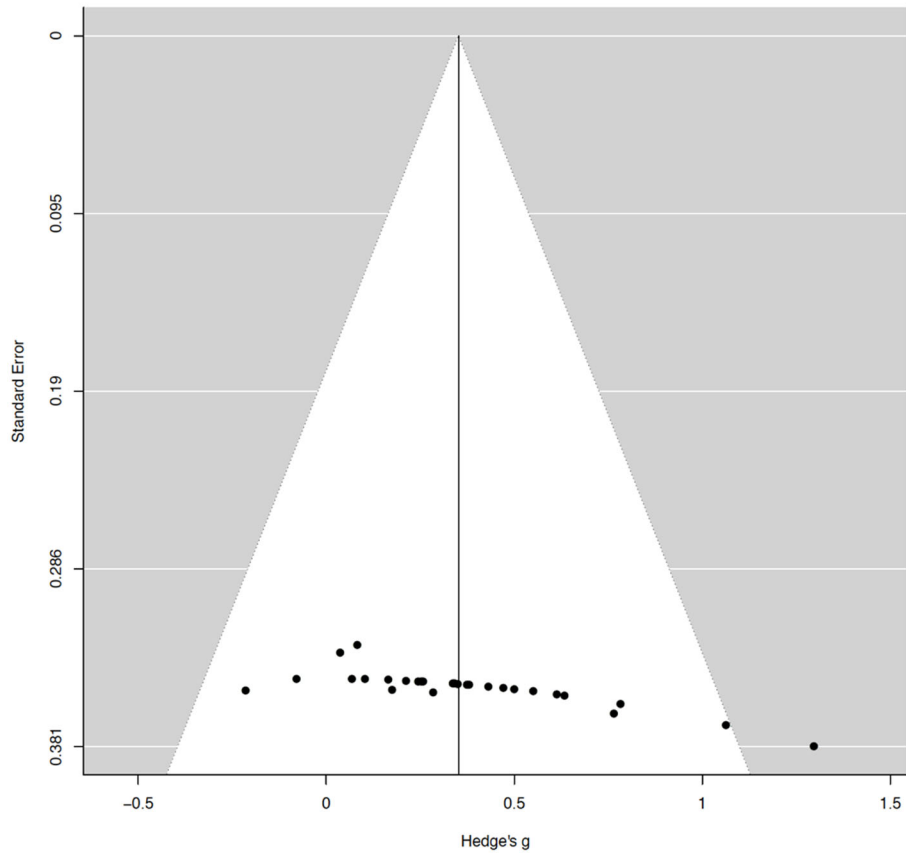

Forest Plot for Improvements

*Note.* Funnel Plot for Relational Improvement

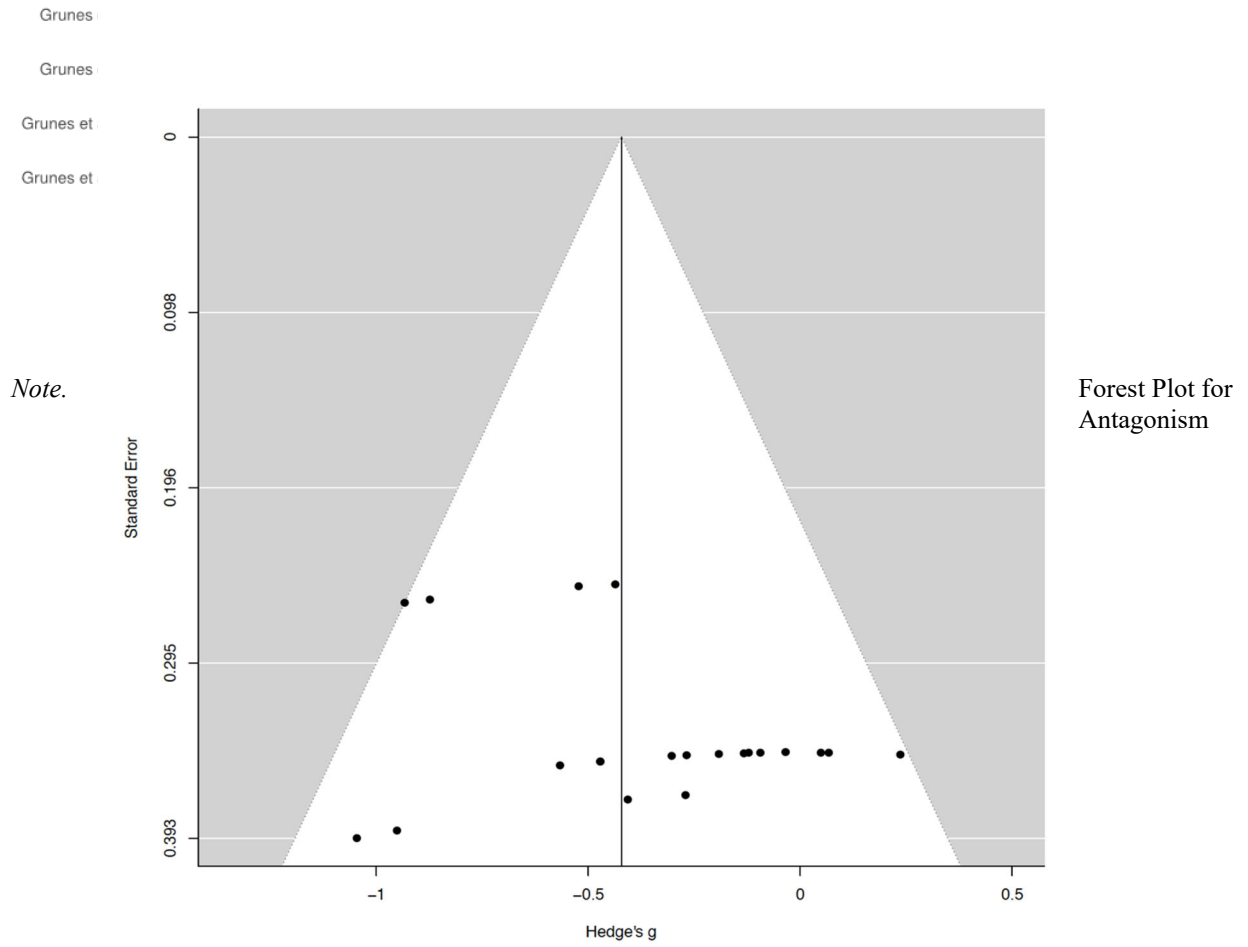

*Note.* Funnel Plot for Antagonism

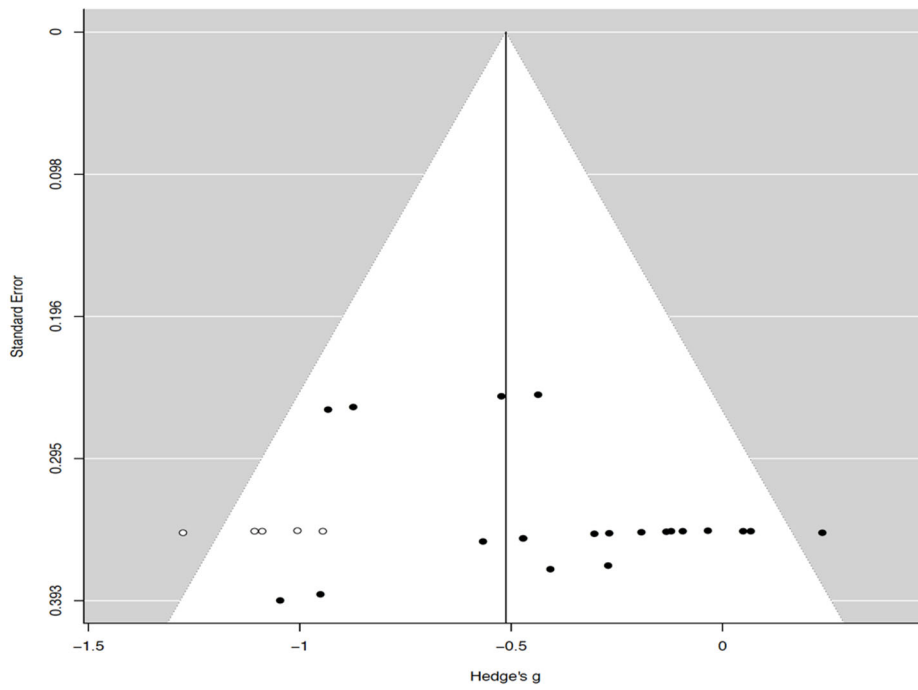

*Note.* Trim-Filled Funnel Plot for Antagonism

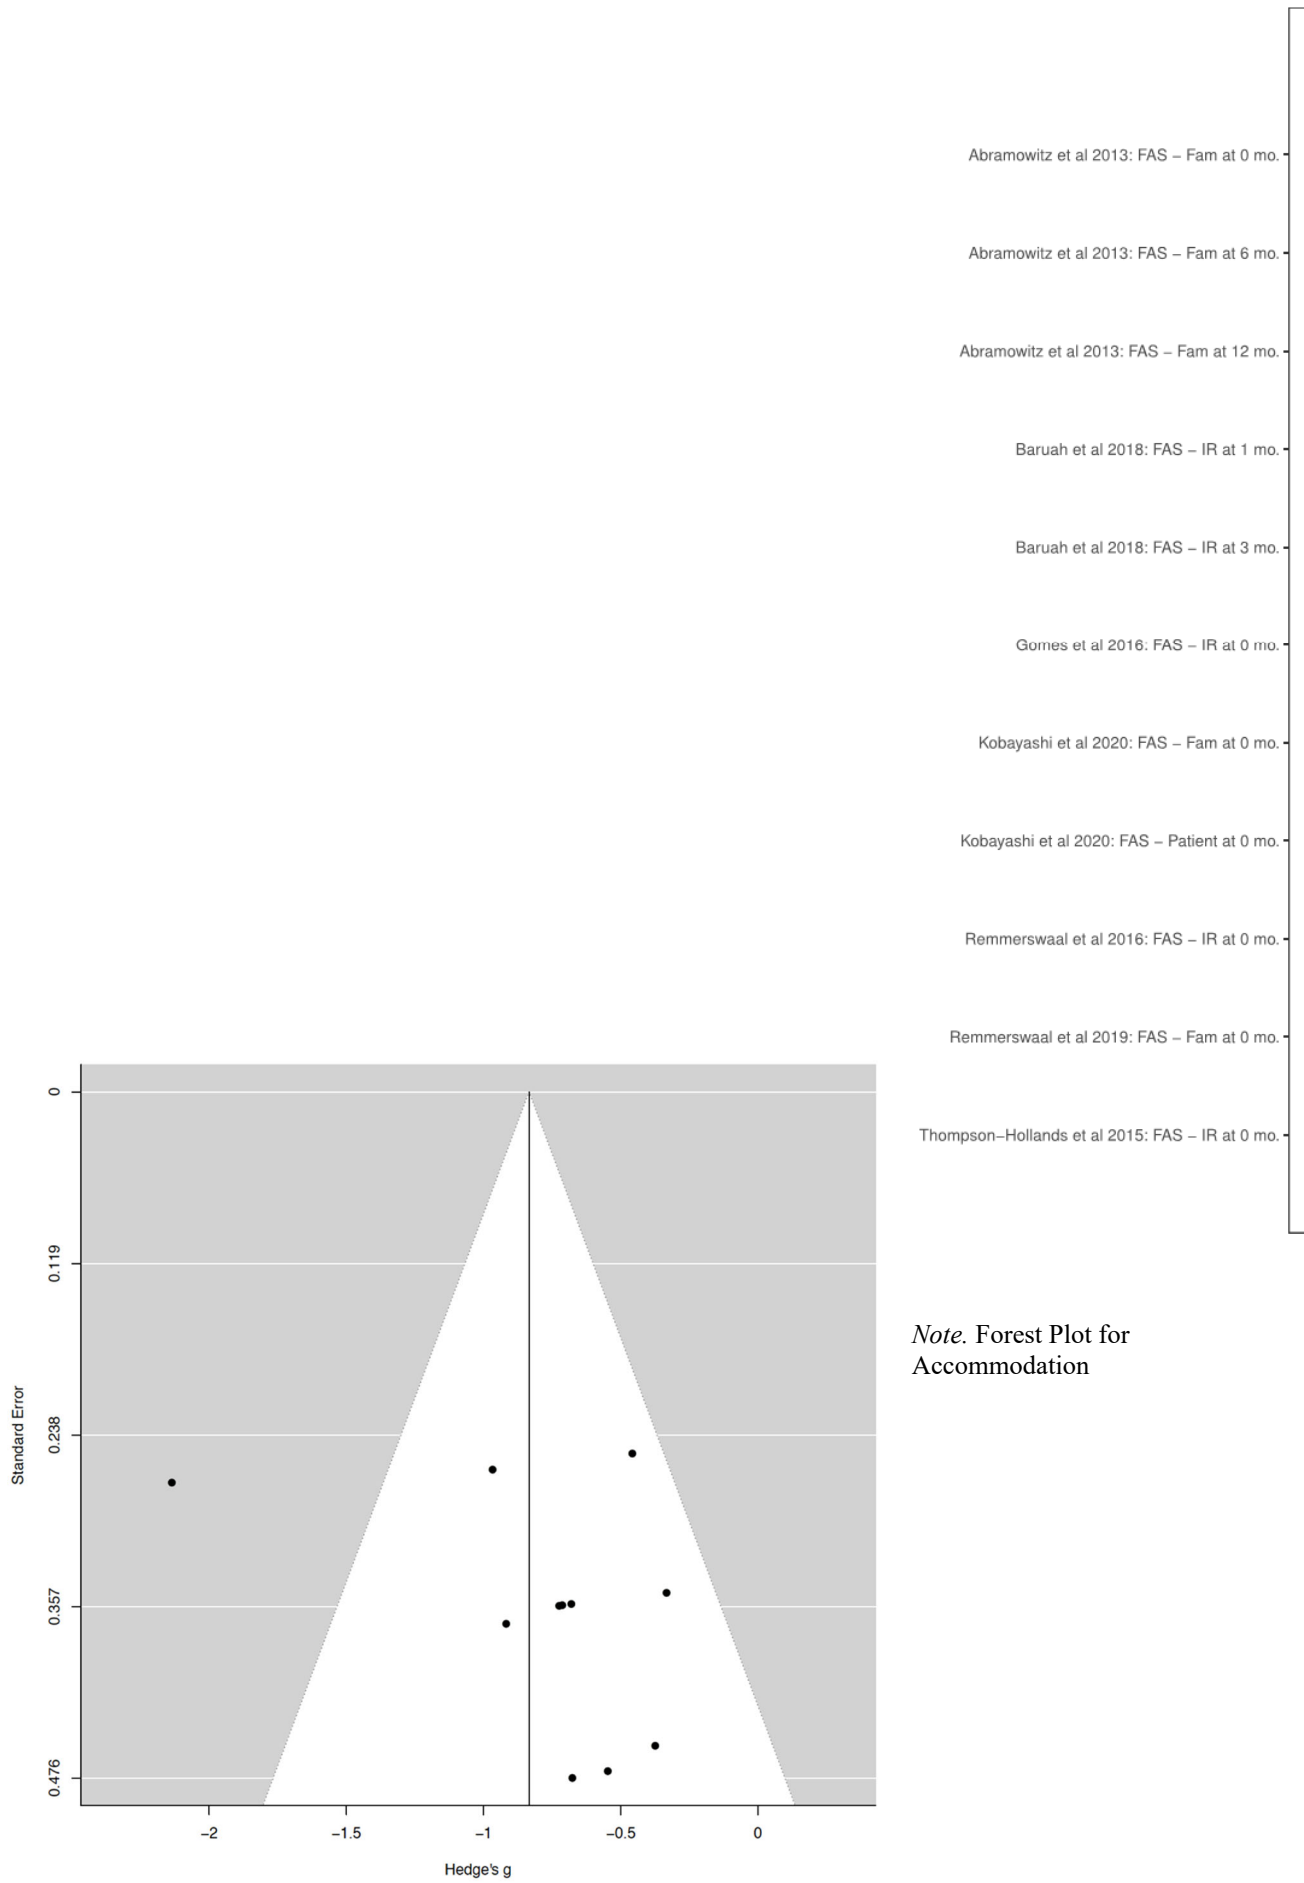

Note. Funnel Plot for Accommodation

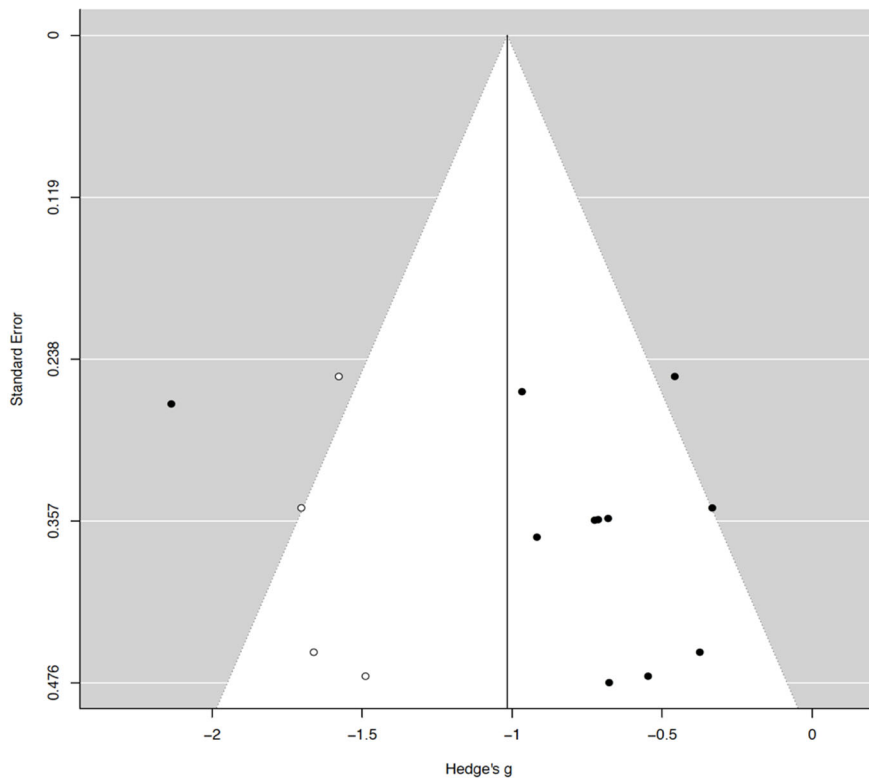

Note. Trim-Filled Funnel Plot for Accommodation



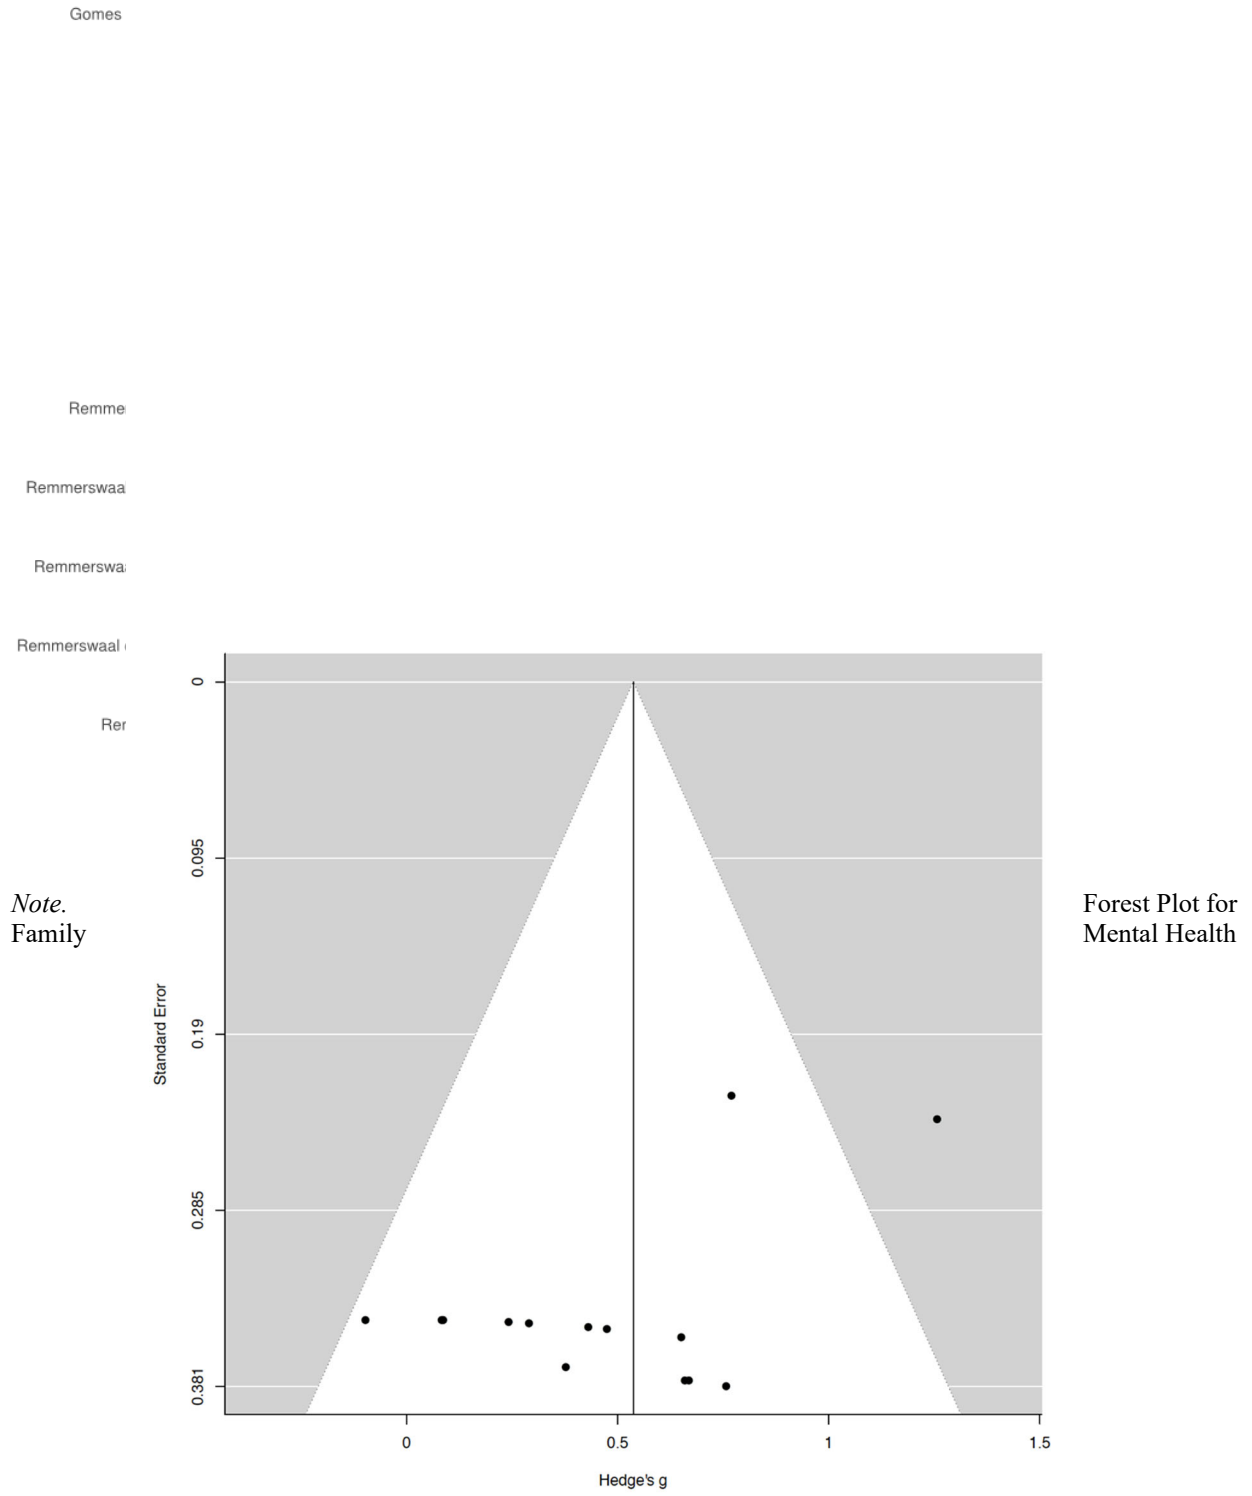

*Note.* Funnel Plot for Family Mental Health

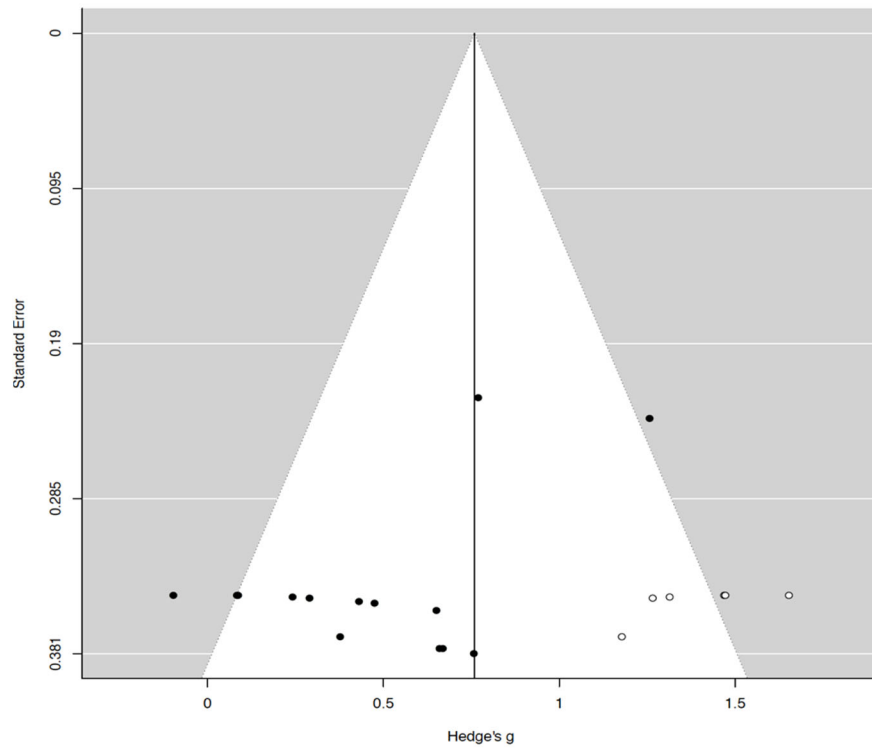

*Note.* Trim-Filled Funnel Plot for Family Mental Health

**Appendix E**

**Forrest and Funnel Plots Comparing FIT to ERP**

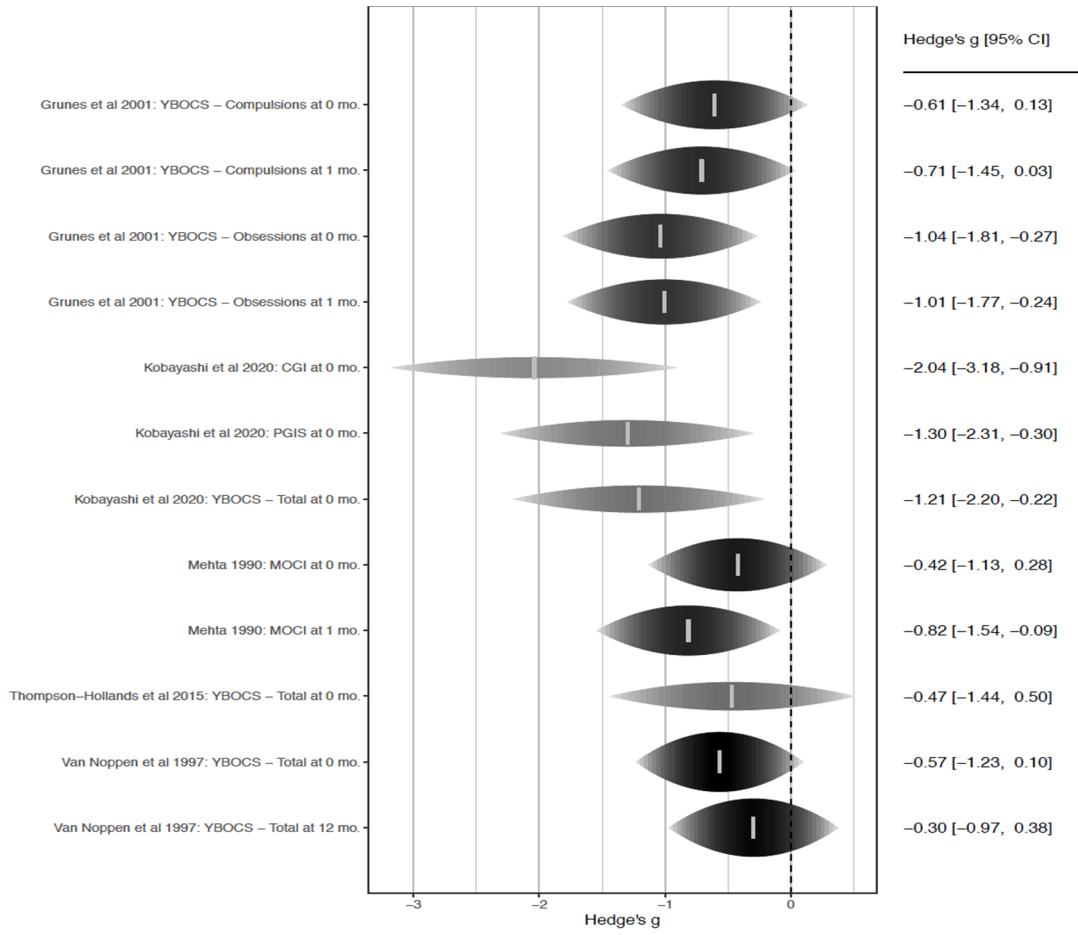

Note. Forest Plot for OCD Symptoms

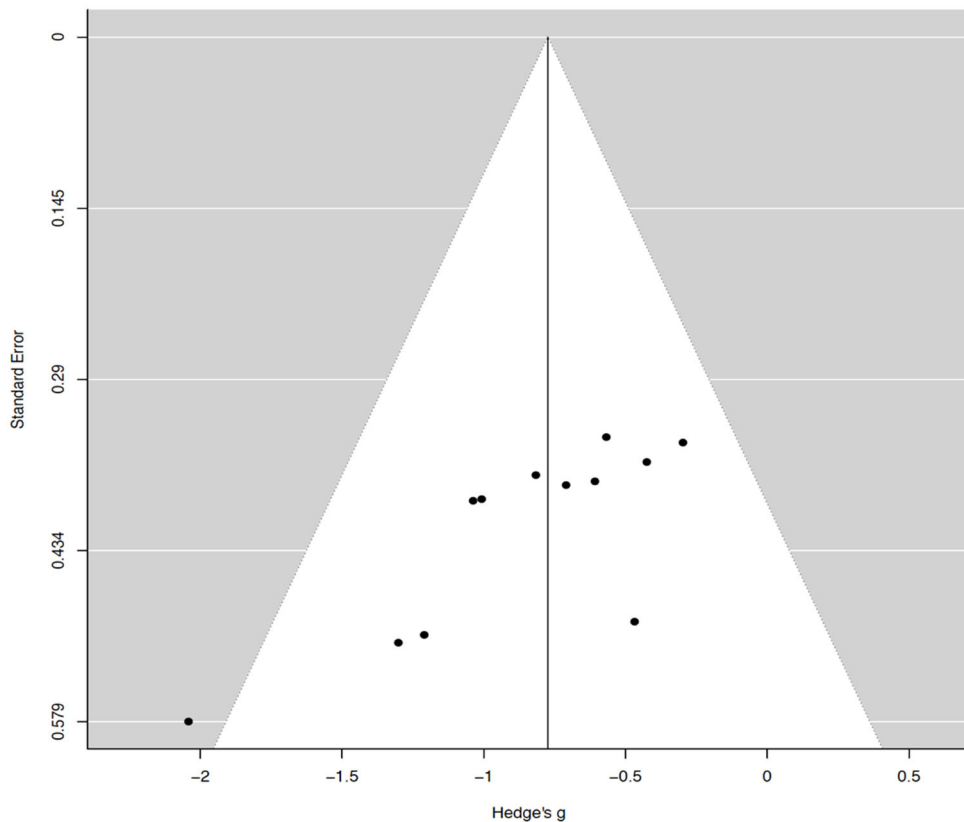

Note. Funnel Plot for OCD Symptoms

Note.  
Filled  
Plot for

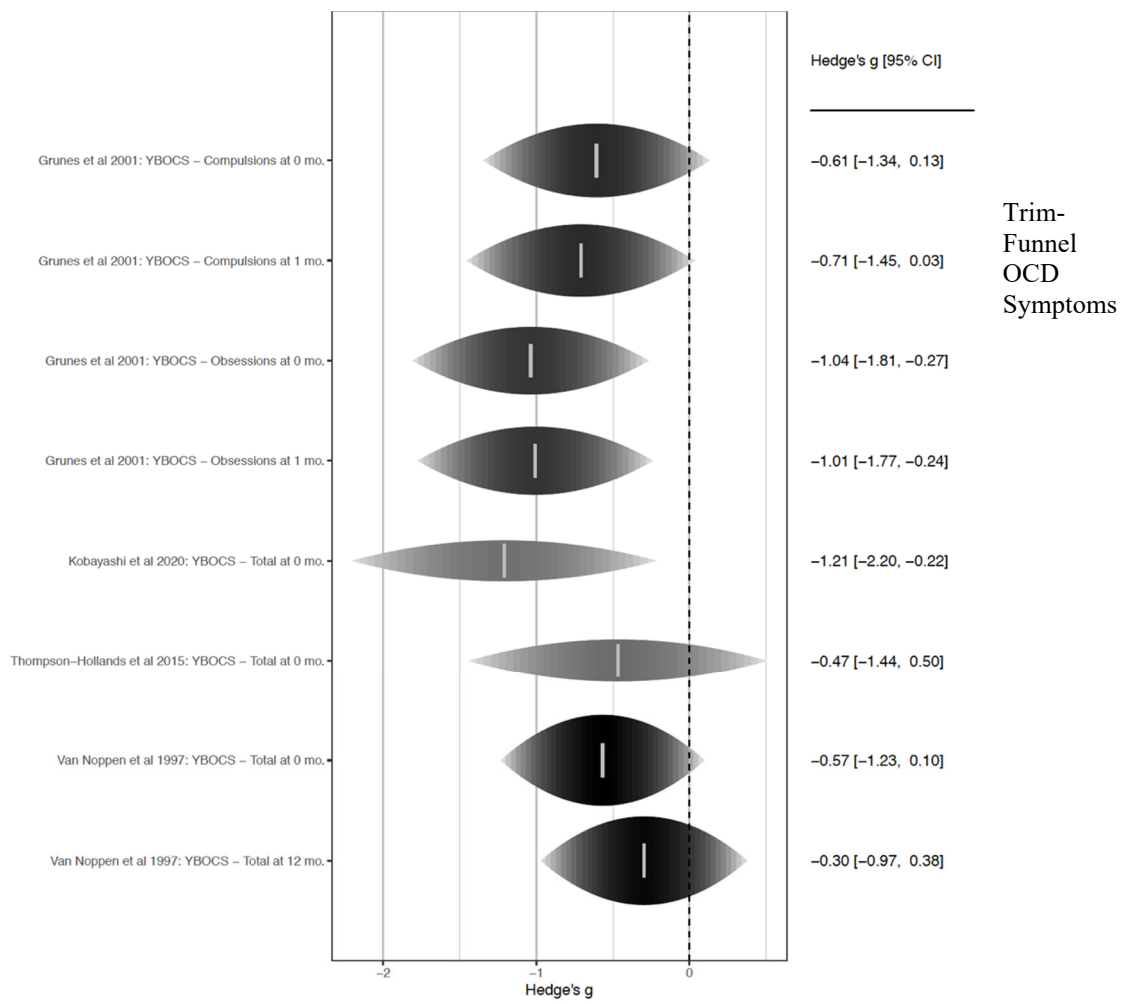

*Note.* Forest Plot for YBOCS

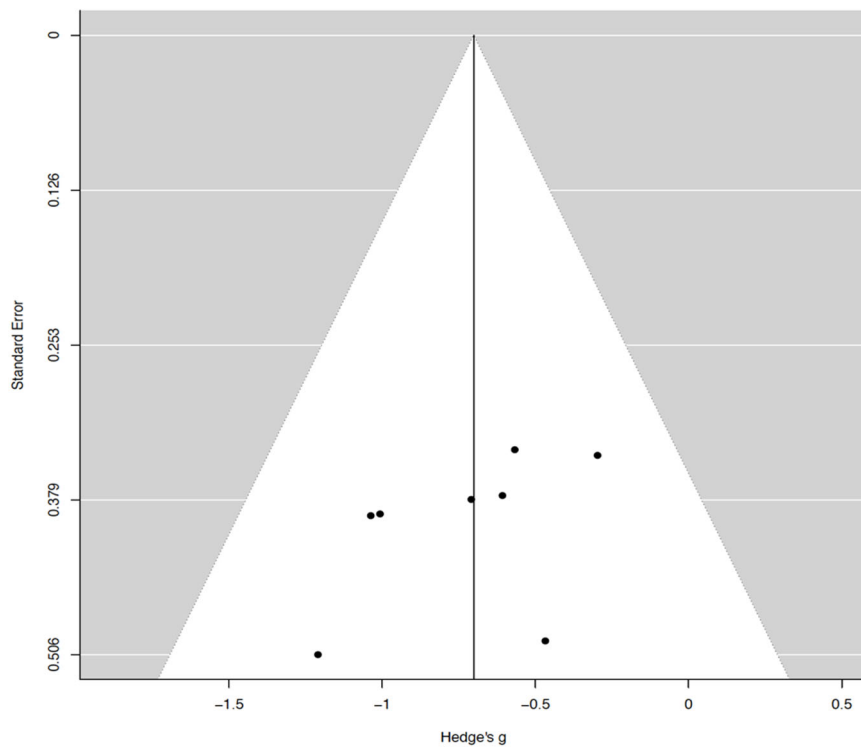

Note. Funnel Plot for YBOCS

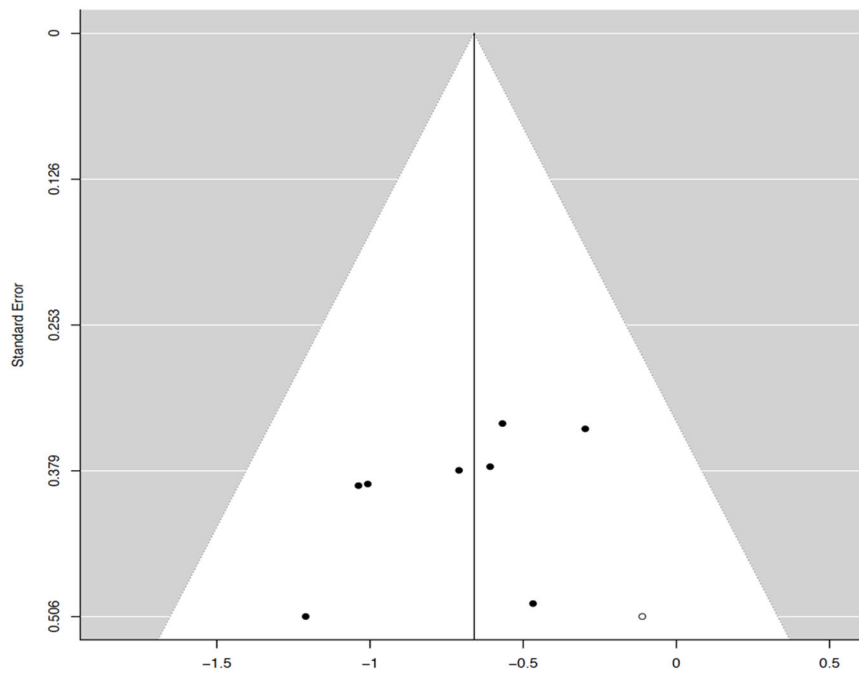

Note.

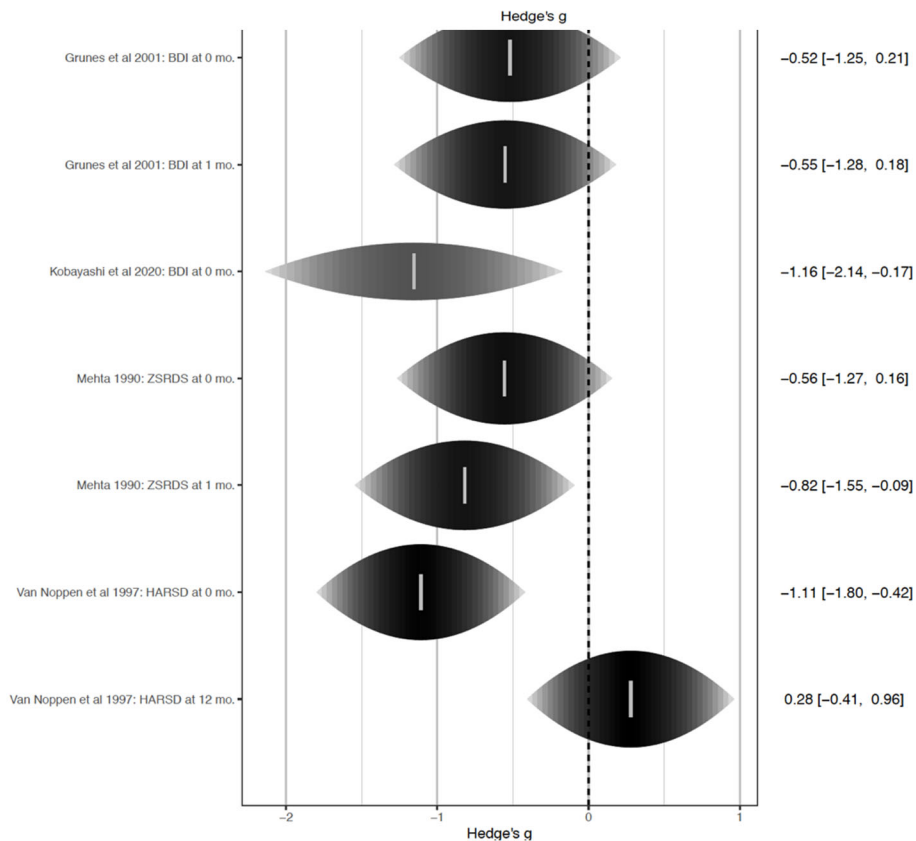

Trim-Filled  
Funnel Plot for  
YBOCS

*Note.* Forest Plot for Depression Symptoms

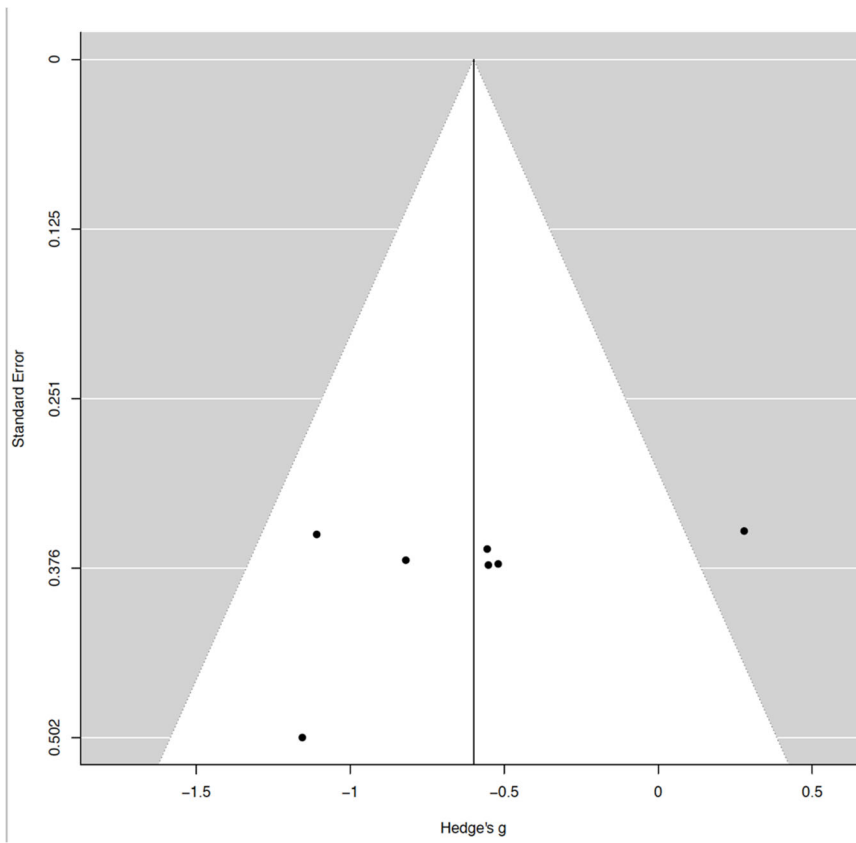

*Note.* Funnel Plot for Depression Symptoms

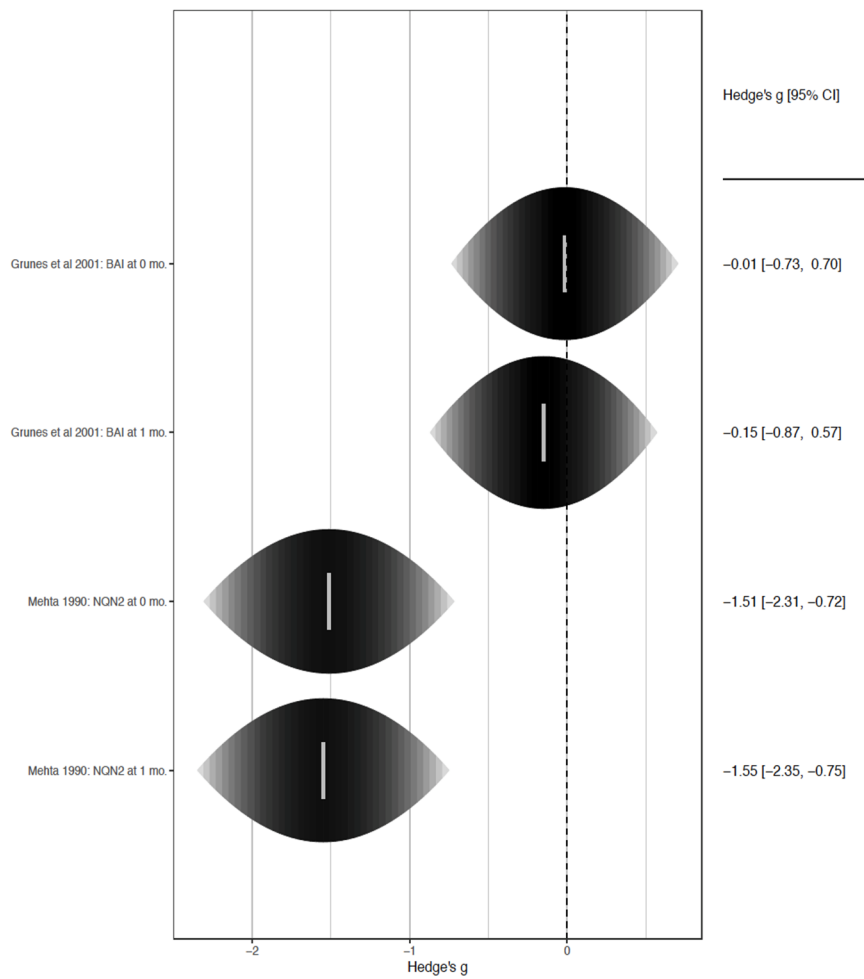



*Note.* Forest Plot for Anxiety Symptoms

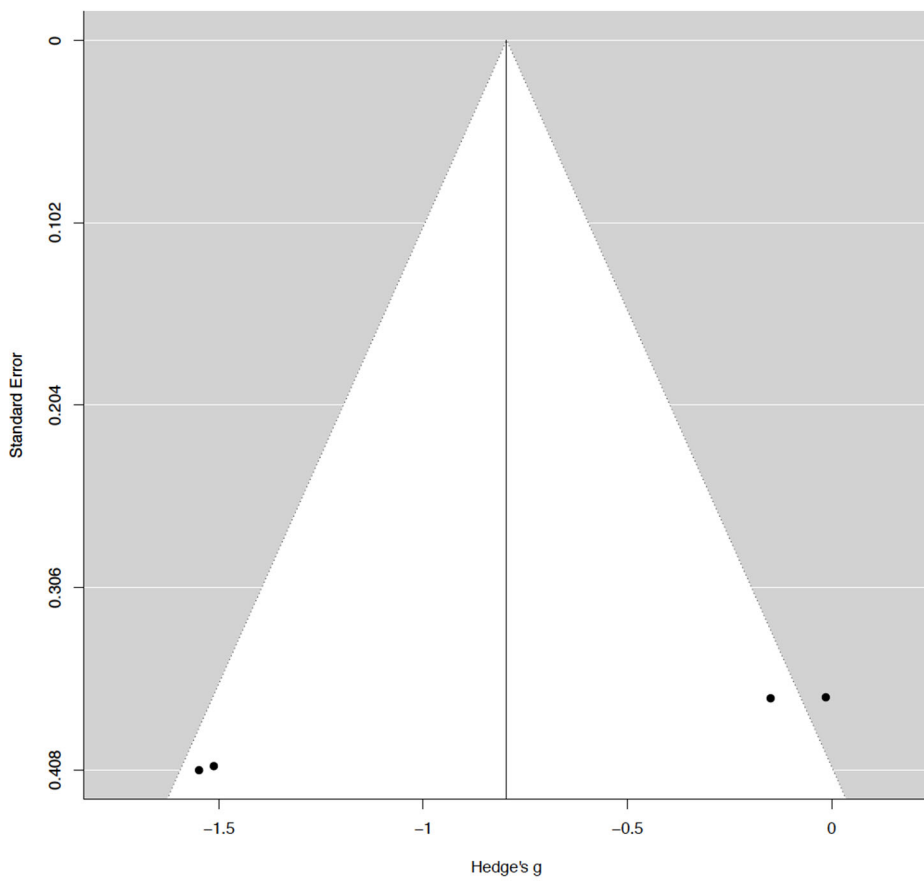

Note. Funnel Plot for Anxiety Symptoms

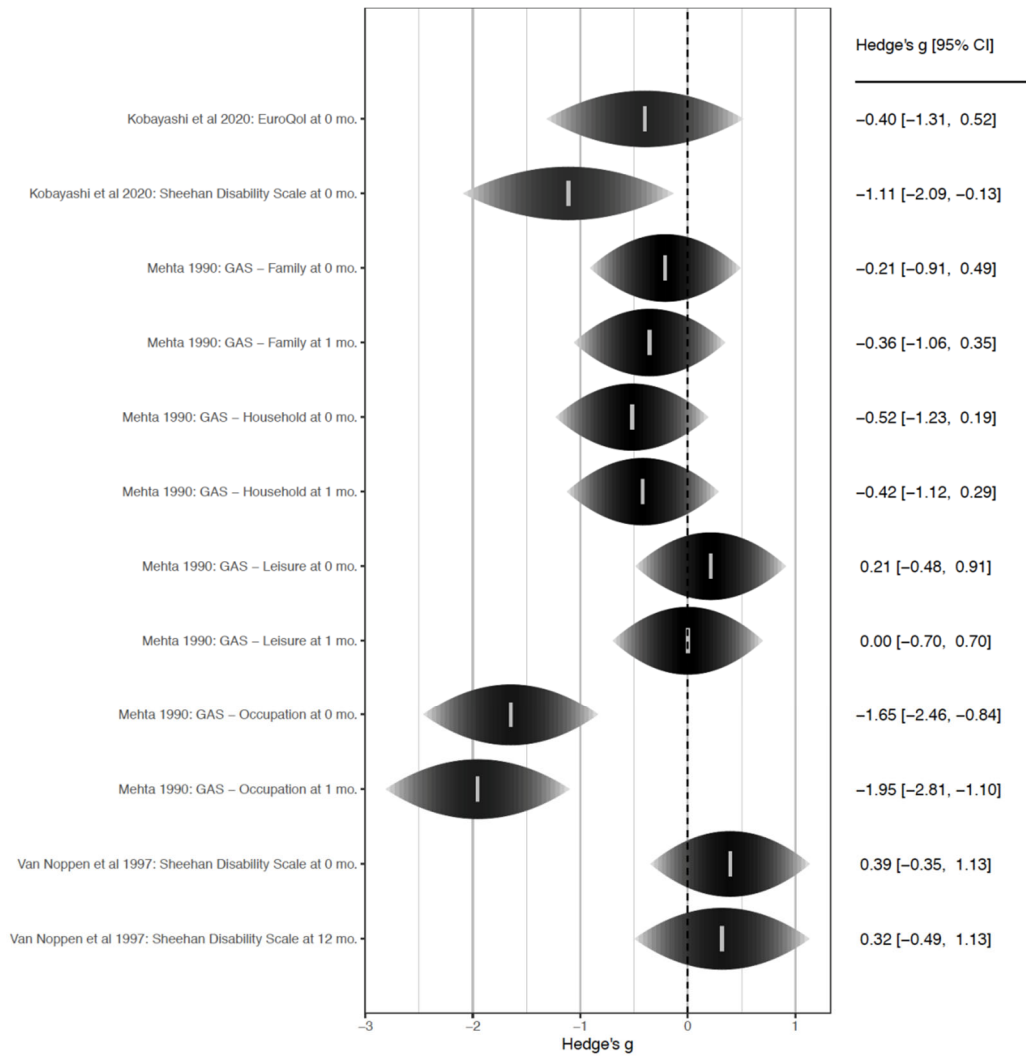

*Note.* Forest Plot for Functional Impairment

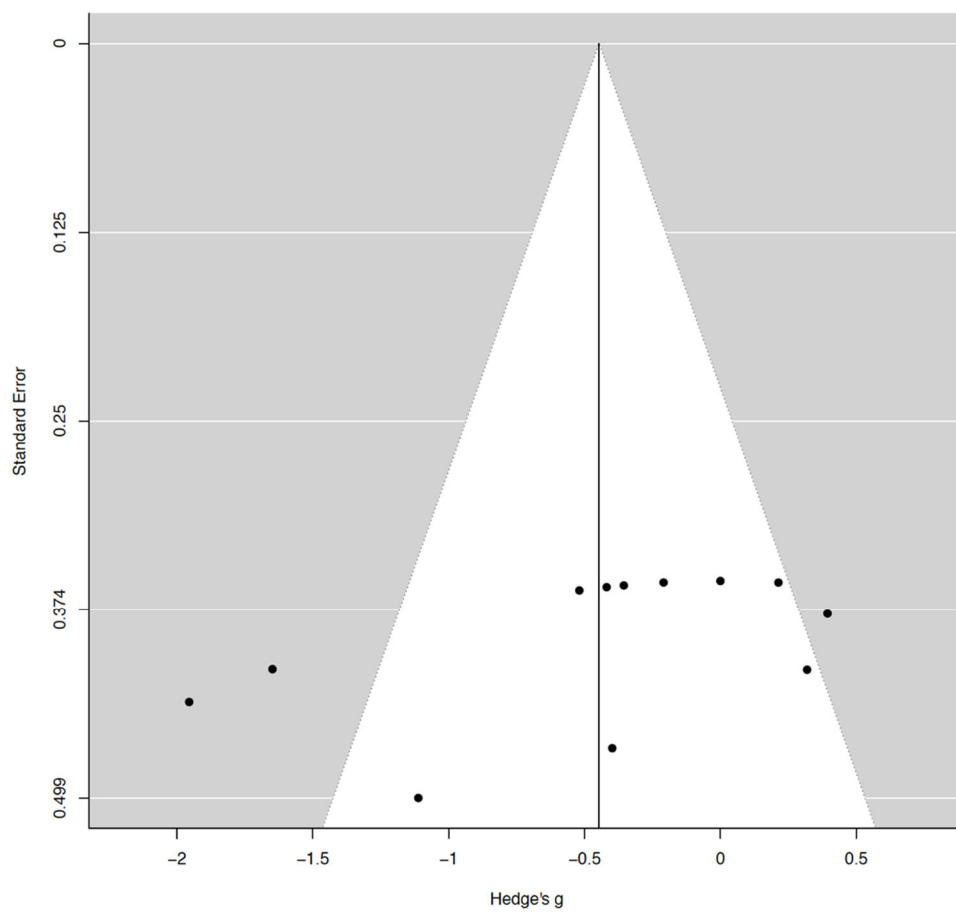

Note. Funnel Plot for Functional Impairment

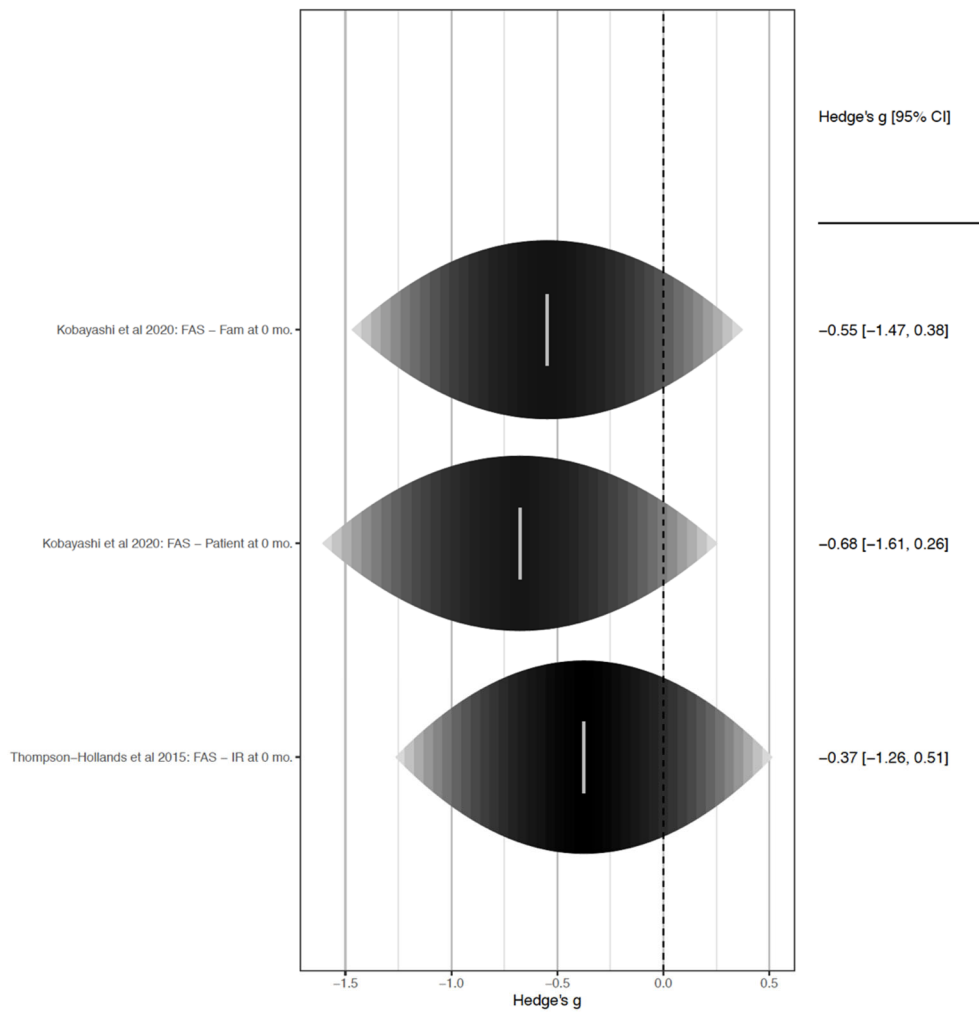

*Note.* Forest Plot for Accommodation

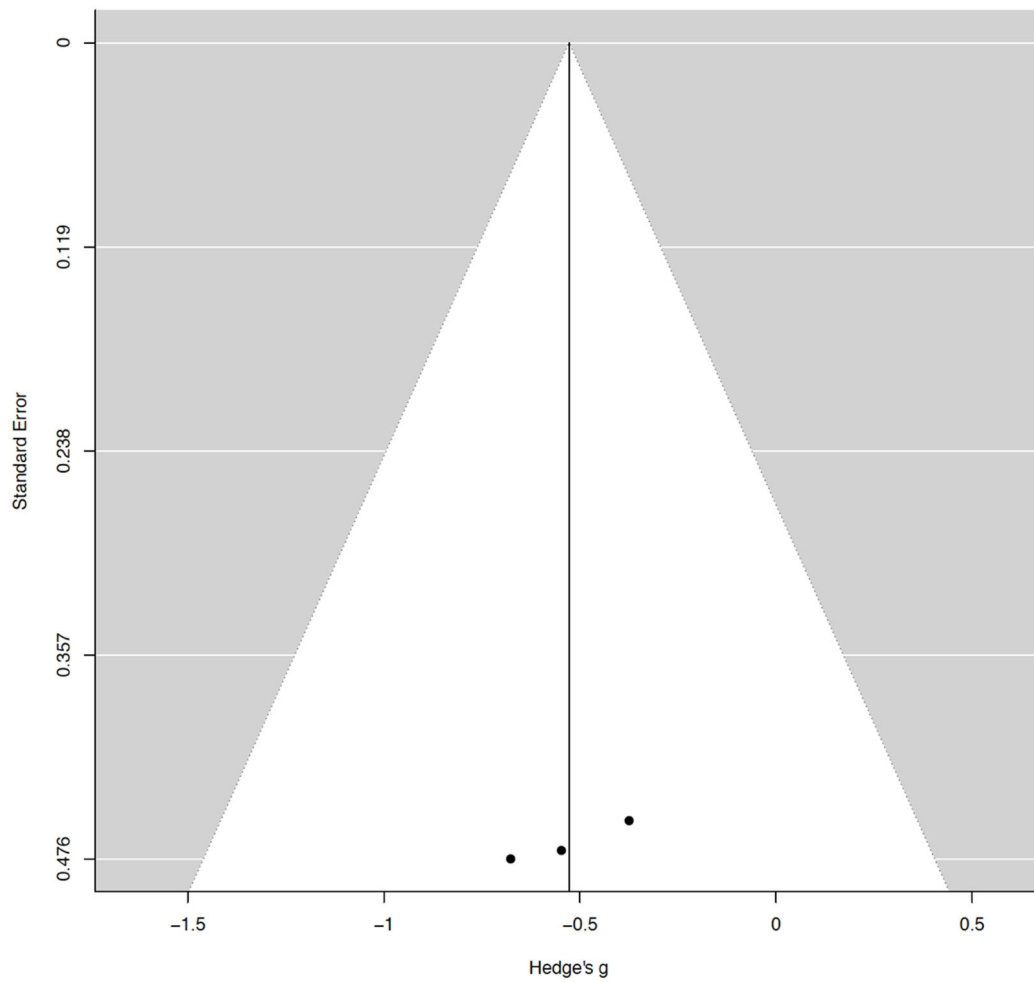

*Note.* Funnel Plot for Accommodation
